# Supplementary material for: Not Asian Anymore: Reconstruction of the History, Evolution, and Dispersal of the “Asian” Lineage of CPV-2c
Source: MDPI journal article supplement (doi:10.3390/v15091962), 2023-09-20
Supplement: s1 [file s1]

# Not Asian Anymore: Reconstruction of the History, Evolution, and Dispersal of the “Asian” lineage of CPV-2c

Giovanni Franzo, Francesco Mira, Giorgia Schiro and Marta Canuti

**Table S1.** Number of sequences within the Asian CPV-2c lineage identified in each country, year, host, and for each variant

| Country     | N sequences | Country   | N sequences | Country     | N sequences |
|-------------|-------------|-----------|-------------|-------------|-------------|
| Australia   | 1           | Indonesia | 7           | Singapore   | 3           |
| Canada      | 1           | Iraq      | 2           | South Korea | 10          |
| China       | 569         | Italy     | 137         | Taiwan      | 6           |
| Egypt       | 14          | Mongolia  | 1           | Thailand    | 15          |
| Ethiopia    | 4           | Myanmar   | 15          | Turkey      | 1           |
| Hungary     | 1           | Nigeria   | 18          | Viet Nam    | 70          |
| India       | 25          | Romania   | 10          | Unknown     | 7           |
| Year        | N sequences | Year      | N sequences | Year        | N sequences |
| 2013        | 8           | 2018      | 119         | 2018-2019   | 16          |
| 2014        | 28          | 2019      | 256         | 2020-2021   | 1           |
| 2015        | 6           | 2020      | 201         | Unknown     | 22          |
| 2016        | 48          | 2021      | 83          |             |             |
| 2017        | 102         | 2022      | 44          |             |             |
| Host        | N sequences | Variant   | N sequences |             |             |
| Cat         | 12          | CPV-2a    | 4           |             |             |
| Dog*        | 895         | CPV-2b    | 7           |             |             |
| Pangolin    | 3           | CPV-2c    | 872         |             |             |
| Raccoon dog | 1           | Unknown   | 35          |             |             |
| Unknown     | 6           |           |             |             |             |

\* labelled as dog, canine, canis, or puppy.

# VP2

|        | 5 | 267 | 297 | 324 | 370 | 426 | 440 | N   | %    |
|--------|---|-----|-----|-----|-----|-----|-----|-----|------|
| CPV-2c | A | F   | A   | Y   | Q   | E   | T   | 450 | 88.2 |
|        | A | F   | A   | Y   | Q   | E   | A   | 50  | 9.8  |
|        | A | F   | N   | Y   | Q   | E   | T   | 2   | 0.4  |
|        | A | F   | A   | Y   | Q   | E   | S   | 2   | 0.4  |
|        | F | F   | A   | Y   | Q   | E   | T   | 1   | 0.2  |
|        | A | F   | A   | Y   | R   | E   | T   | 1   | 0.2  |
|        | A | Y   | A   | Y   | Q   | E   | T   | 1   | 0.2  |
|        | A | Y   | A   | Y   | Q   | E   | A   | 1   | 0.2  |
|        | G | F   | A   | Y   | R   | E   | T   | 1   | 0.2  |

|        | 5 | 267 | 297 | 324 | 370 | 426 | 440 | N   | %    |
|--------|---|-----|-----|-----|-----|-----|-----|-----|------|
| CPV-2a | A | Y   | A   | I   | Q   | N   | A   | 657 | 38.5 |
|        | A | F   | A   | Y   | Q   | N   | T   | 398 | 23.3 |
|        | A | F   | A   | I   | Q   | N   | T   | 249 | 14.6 |
|        | A | F   | S   | Y   | Q   | N   | T   | 191 | 11.2 |
|        | A | F   | A   | Y   | Q   | N   | A   | 51  | 3.0  |
|        | A | F   | A   | L   | Q   | N   | T   | 33  | 1.9  |
|        | A | F   | A   | Y   | Q   | N   | S   | 28  | 1.6  |
|        | A | Y   | A   | I   | Q   | N   | T   | 22  | 1.3  |
|        | G | Y   | A   | Y   | Q   | N   | T   | 11  | 0.6  |
|        | A | F   | A   | I   | Q   | N   | A   | 8   | 0.5  |
|        | G | Y   | A   | I   | Q   | N   | A   | 7   | 0.4  |
|        | G | F   | A   | I   | Q   | N   | T   | 7   | 0.4  |
|        | A | F   | N   | Y   | Q   | N   | T   | 6   | 0.4  |
|        | A | F   | A   | I   | R   | N   | T   | 6   | 0.4  |
|        | A | F   | N   | Y   | Q   | N   | A   | 4   | 0.2  |
|        | A | F   | A   | L   | Q   | N   | A   | 4   | 0.2  |
|        | G | F   | A   | Y   | Q   | N   | T   | 4   | 0.2  |
|        | A | F   | A   | F   | Q   | N   | T   | 4   | 0.2  |
|        | A | Y   | A   | Y   | Q   | N   | T   | 3   | 0.2  |
|        | A | F   | A   | N   | Q   | N   | T   | 3   | 0.2  |
|        | A | F   | A   | F   | Q   | N   | A   | 1   | 0.1  |
|        | A | F   | S   | I   | Q   | N   | T   | 1   | 0.1  |
|        | A | Y   | A   | T   | Q   | N   | A   | 1   | 0.1  |
|        | T | F   | S   | Y   | Q   | N   | T   | 1   | 0.1  |
|        | G | F   | S   | Y   | Q   | N   | T   | 1   | 0.1  |
|        | P | Y   | A   | I   | Q   | N   | A   | 1   | 0.1  |
|        | A | F   | S   | I   | Q   | N   | A   | 1   | 0.1  |
|        | A | F   | N   | I   | Q   | N   | T   | 1   | 0.1  |
|        | A | Y   | A   | I   | K   | N   | A   | 1   | 0.1  |
|        | G | Y   | S   | Y   | Q   | N   | T   | 1   | 0.1  |
|        | V | F   | A   | I   | Q   | N   | T   | 1   | 0.1  |

|        | 5 | 267 | 297 | 324 | 370 | 426 | 440 | N   | %    |
|--------|---|-----|-----|-----|-----|-----|-----|-----|------|
| CPV-2b | A | F   | A   | Y   | Q   | D   | T   | 434 | 54.3 |
|        | A | Y   | A   | I   | Q   | D   | A   | 162 | 20.3 |
|        | G | Y   | A   | Y   | Q   | D   | T   | 43  | 5.4  |
|        | A | F   | N   | L   | Q   | D   | T   | 26  | 3.3  |
|        | A | Y   | A   | Y   | Q   | D   | T   | 24  | 3.0  |
|        | A | F   | S   | Y   | Q   | D   | T   | 22  | 2.8  |
|        | A | F   | N   | Y   | Q   | D   | T   | 13  | 1.6  |
|        | A | F   | A   | Y   | Q   | D   | S   | 6   | 0.8  |
|        | A | F   | A   | L   | Q   | D   | T   | 5   | 0.6  |
|        | A | F   | A   | I   | Q   | D   | A   | 3   | 0.4  |
|        | A | F   | A   | I   | Q   | D   | T   | 2   | 0.3  |
|        | G | Y   | A   | I   | Q   | D   | A   | 2   | 0.3  |
|        | A | F   | A   | F   | Q   | D   | A   | 2   | 0.3  |
|        | A | F   | A   | Y   | Q   | D   | A   | 2   | 0.3  |
|        | A | F   | N   | I   | Q   | D   | T   | 2   | 0.3  |
|        | A | Y   | T   | I   | Q   | D   | T   | 1   | 0.1  |
|        | A | L   | A   | Y   | Q   | D   | T   | 1   | 0.1  |
|        | A | Y   | A   | N   | Q   | D   | T   | 1   | 0.1  |
|        | A | Y   | A   | Y   | Q   | D   | A   | 1   | 0.1  |

# NS1

|  | 60 | 544 | 545 | 630 | N   | %    |
|--|----|-----|-----|-----|-----|------|
|  | I  | Y   | E   | L   | 423 | 63.4 |
|  | I  | F   | E   | L   | 114 | 17.1 |
|  | I  | F   | V   | L   | 66  | 9.9  |
|  | I  | Y   | Q   | L   | 38  | 5.7  |
|  | V  | Y   | E   | L   | 9   | 1.3  |
|  | I  | F   | E   | P   | 8   | 1.2  |
|  | I  | Y   | V   | L   | 5   | 0.7  |
|  | I  | Y   | K   | L   | 2   | 0.3  |
|  | V  | F   | E   | L   | 1   | 0.1  |
|  | I  | F   | Q   | L   | 1   | 0.1  |

**Figure S1.** Key amino acids at specific residues in VP2 (left and top-right) and NS1 (bottom-right) defining Asian CPV-2c viruses in strains that do not belong to the Asian CPV-2 lineage. In each panel, the amino acid position is indicated on top, while the number (N) of times and percentages (%) these sequences were found each group are indicated on the right

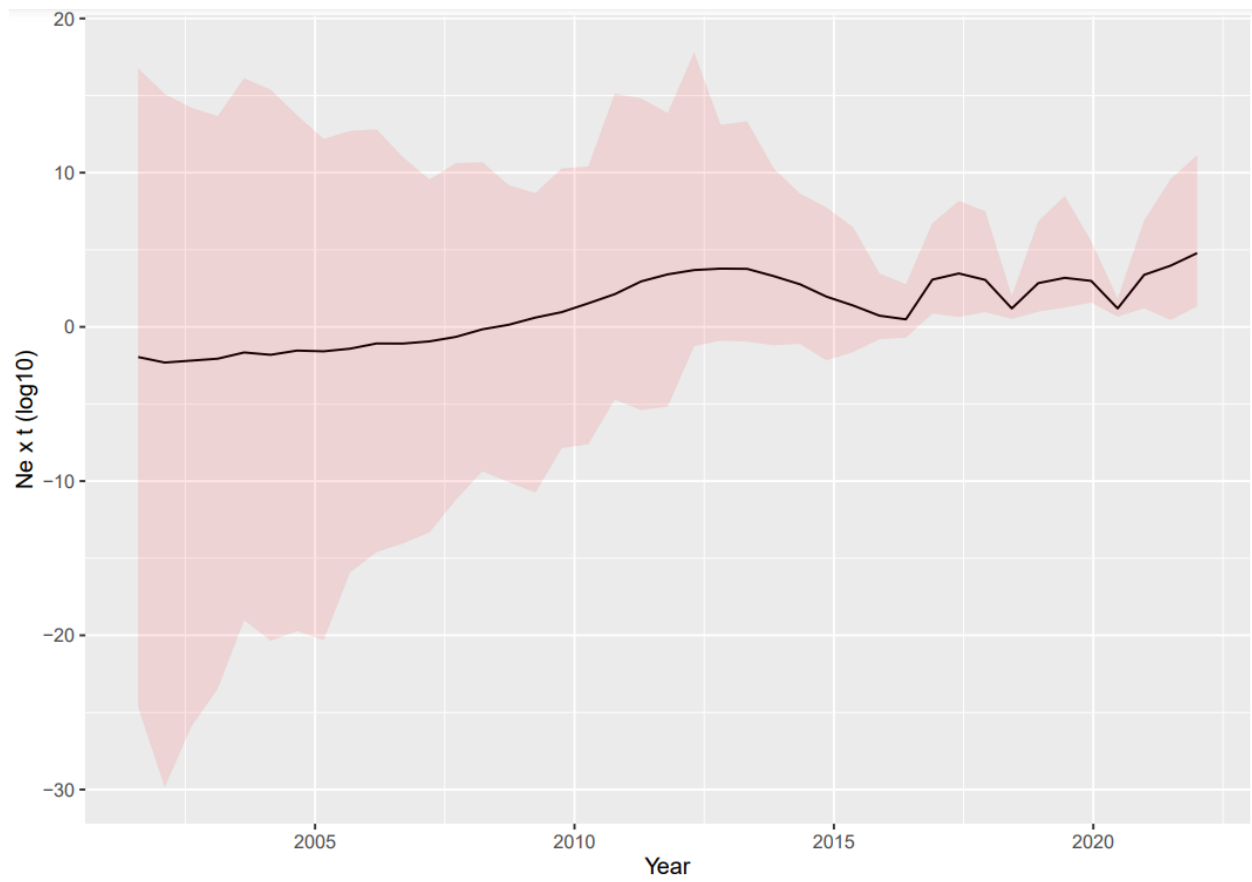

**Figure S2.** Relative genetic diversity ( $N_e \times t$ ) of the Asian CPV-2c lineage over the years estimated using the NS1 gene. Mean, median, and upper and lower 95HPD values are reported

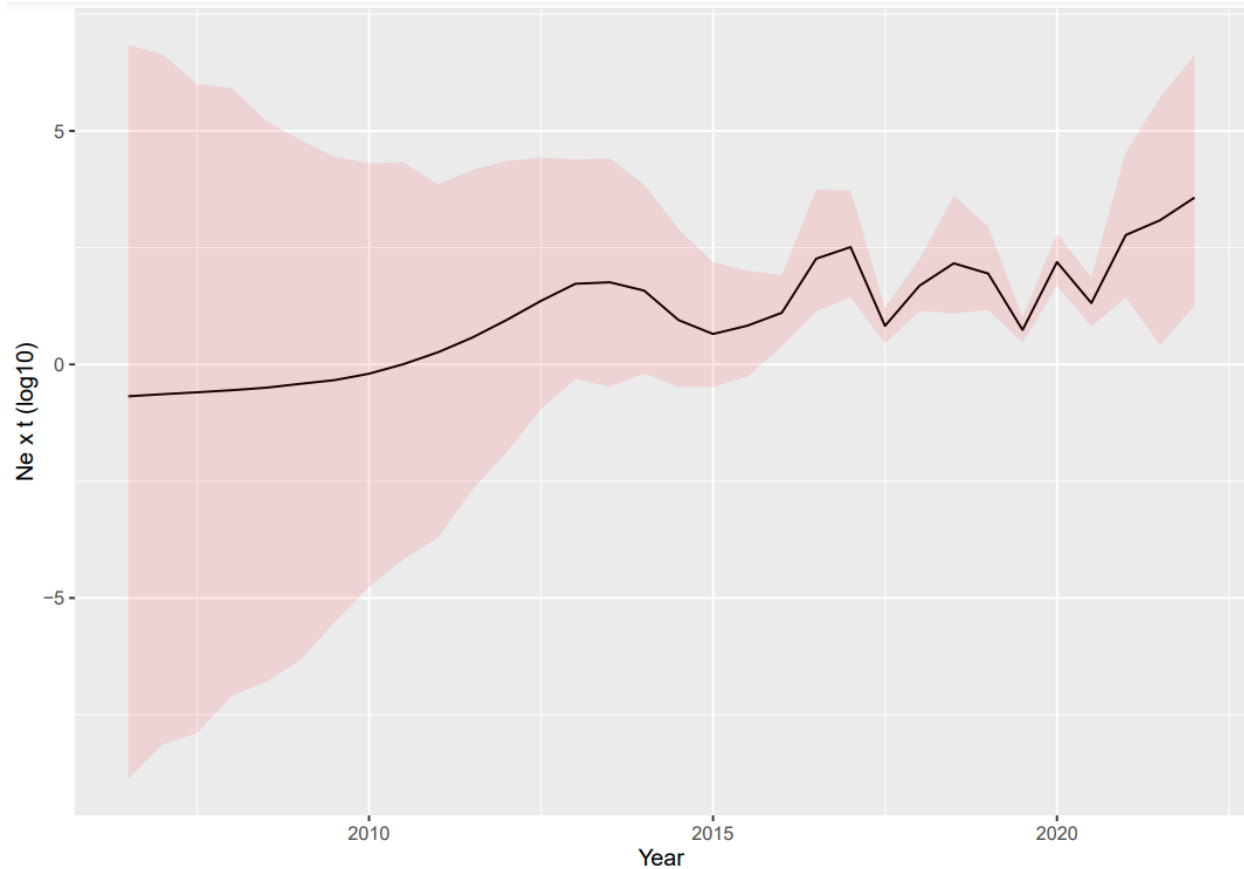

**Figure S3.** Relative genetic diversity ( $N_e \times t$ ) of the Asian CPV-2c lineage over the years estimated using the Complete genome. Mean, median, and upper and lower 95HPD values are reported

**Figure S4.** Maximum clade credibility trees based on the Asian CPV-2c lineage VP2 dataset. The results of the phylogeographic analyses are reported with different colors. Tips and branches have been color-coded according to the collection country or the one estimated with the higher posterior probability, respectively. Countries are reported in different nuances of the color featuring the continent. Node size is proportional to the posterior probability of the inferred locations. The results of different datasets are reported in different panels. [Figure in a separate file]
