# Supplementary material for: Not Asian Anymore: Reconstruction of the History, Evolution, and Dispersal of the “Asian” Lineage of CPV-2c
Source: MDPI journal article supplement (doi:10.3390/v15091962), 2023-09-20
Supplement: s1 [file s1]

Dataset 1

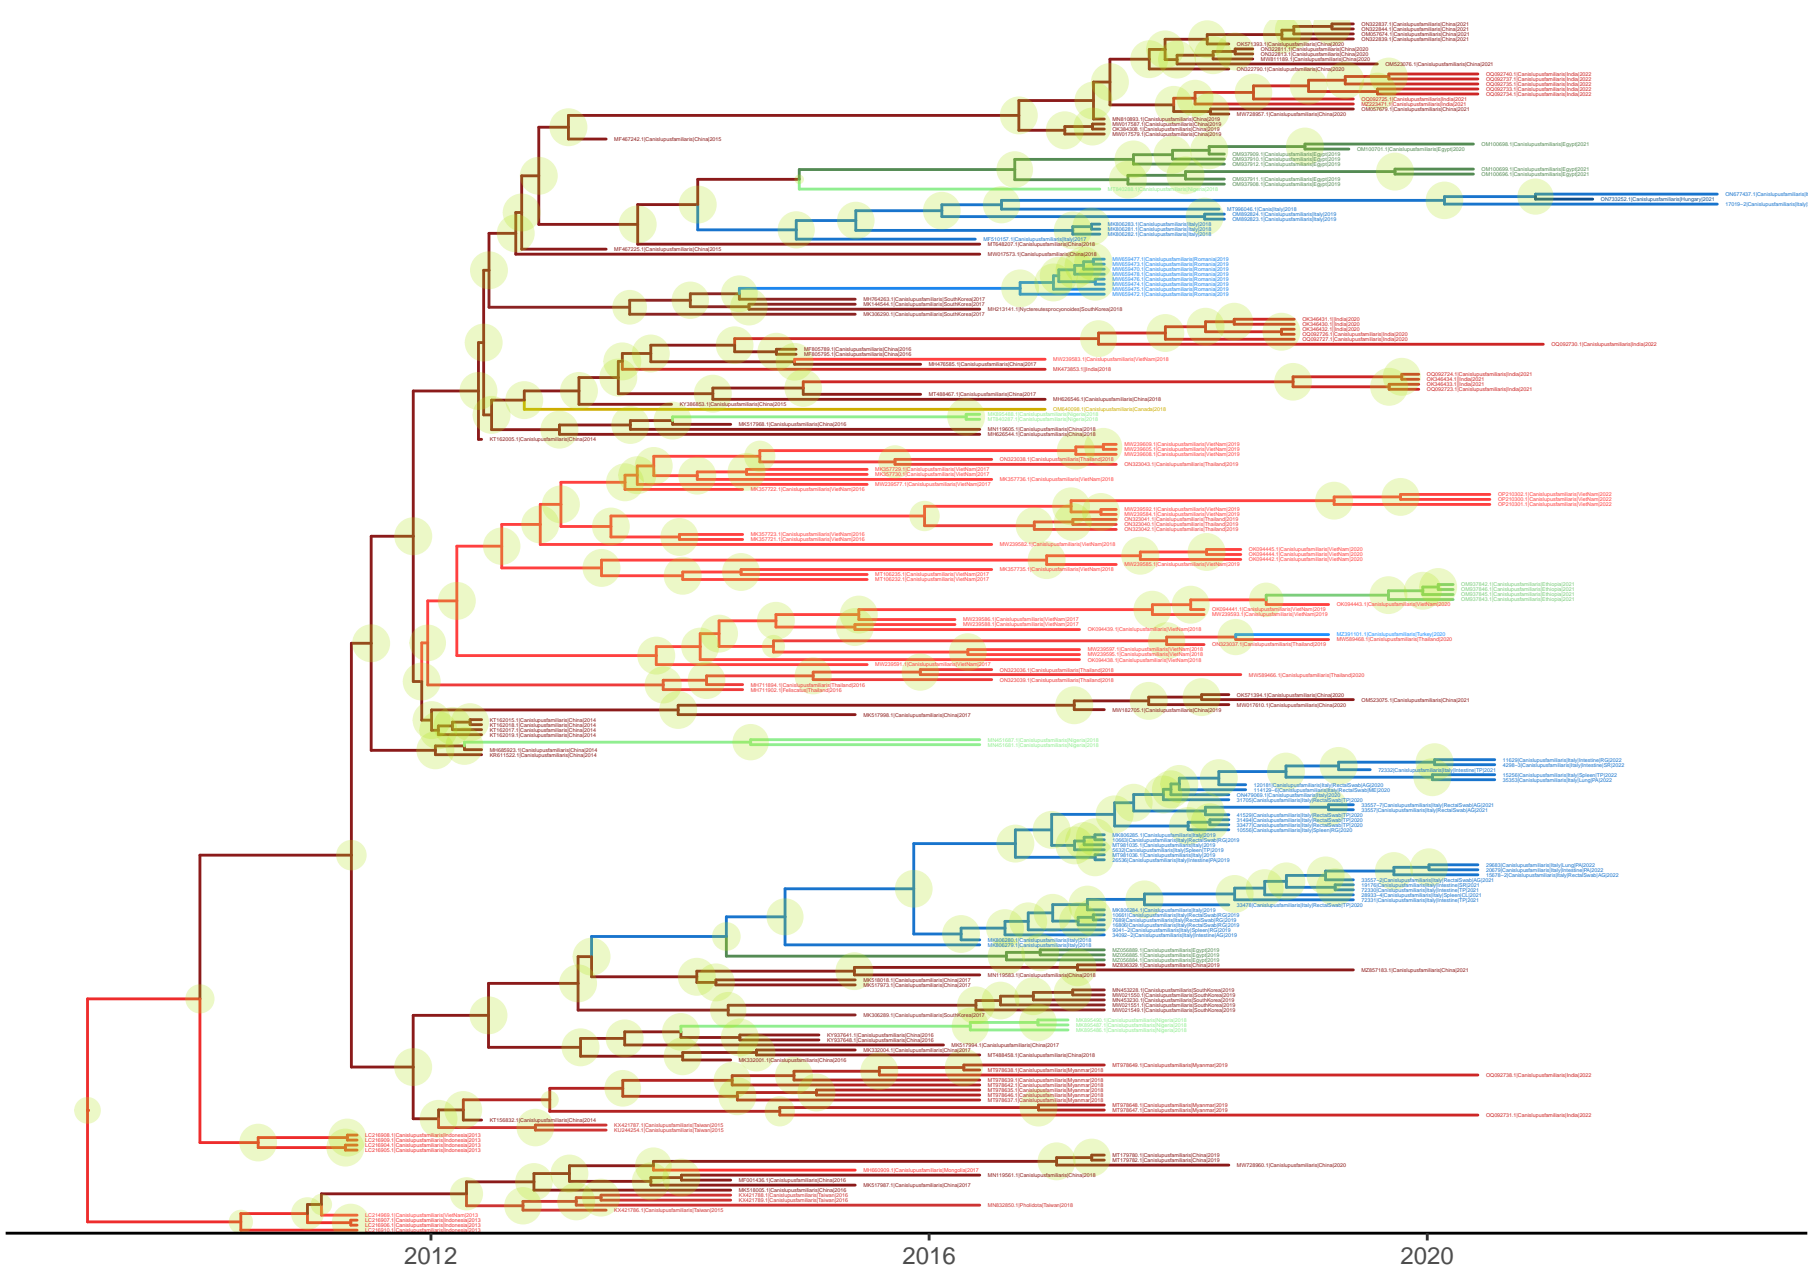

Dataset 2

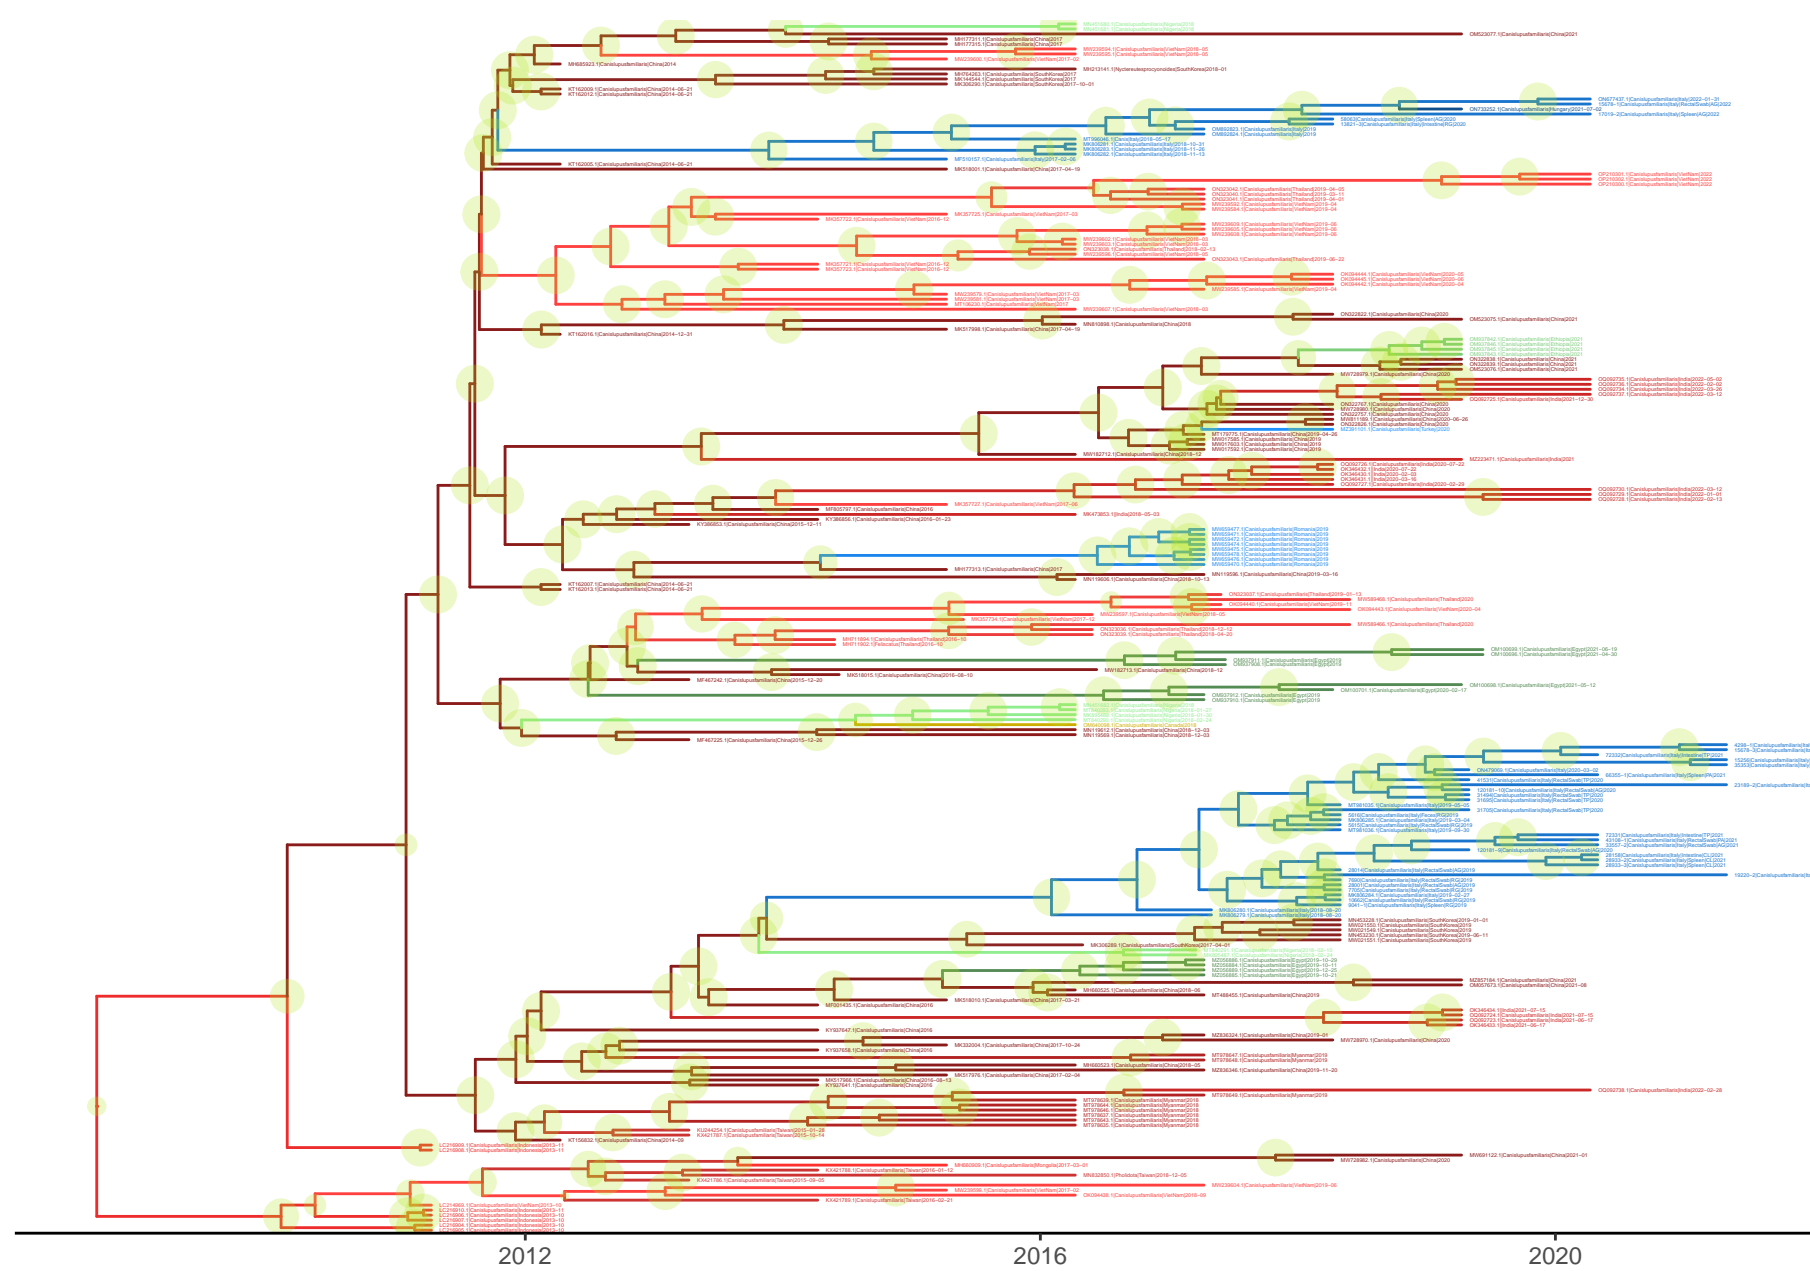

Dataset 3

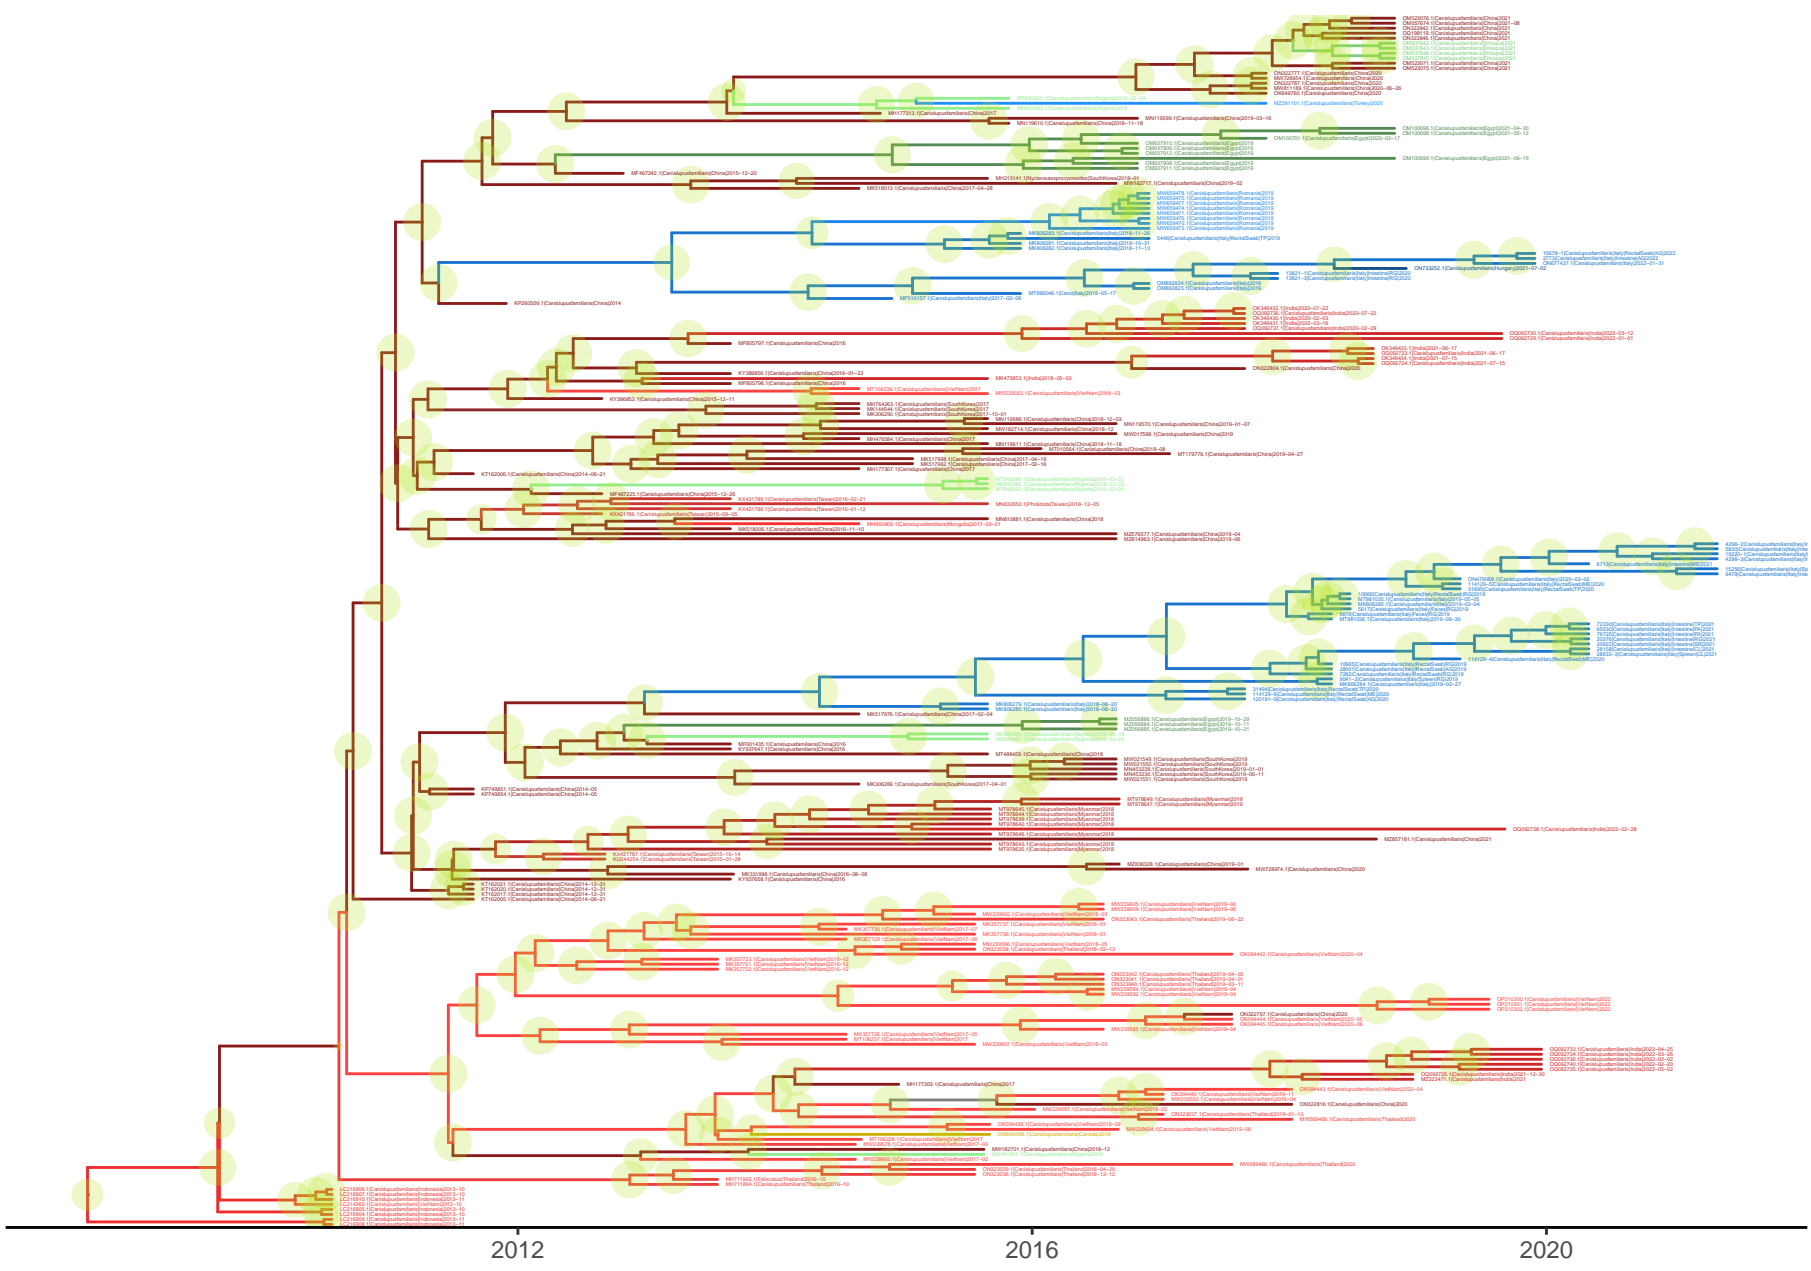

Dataset 4

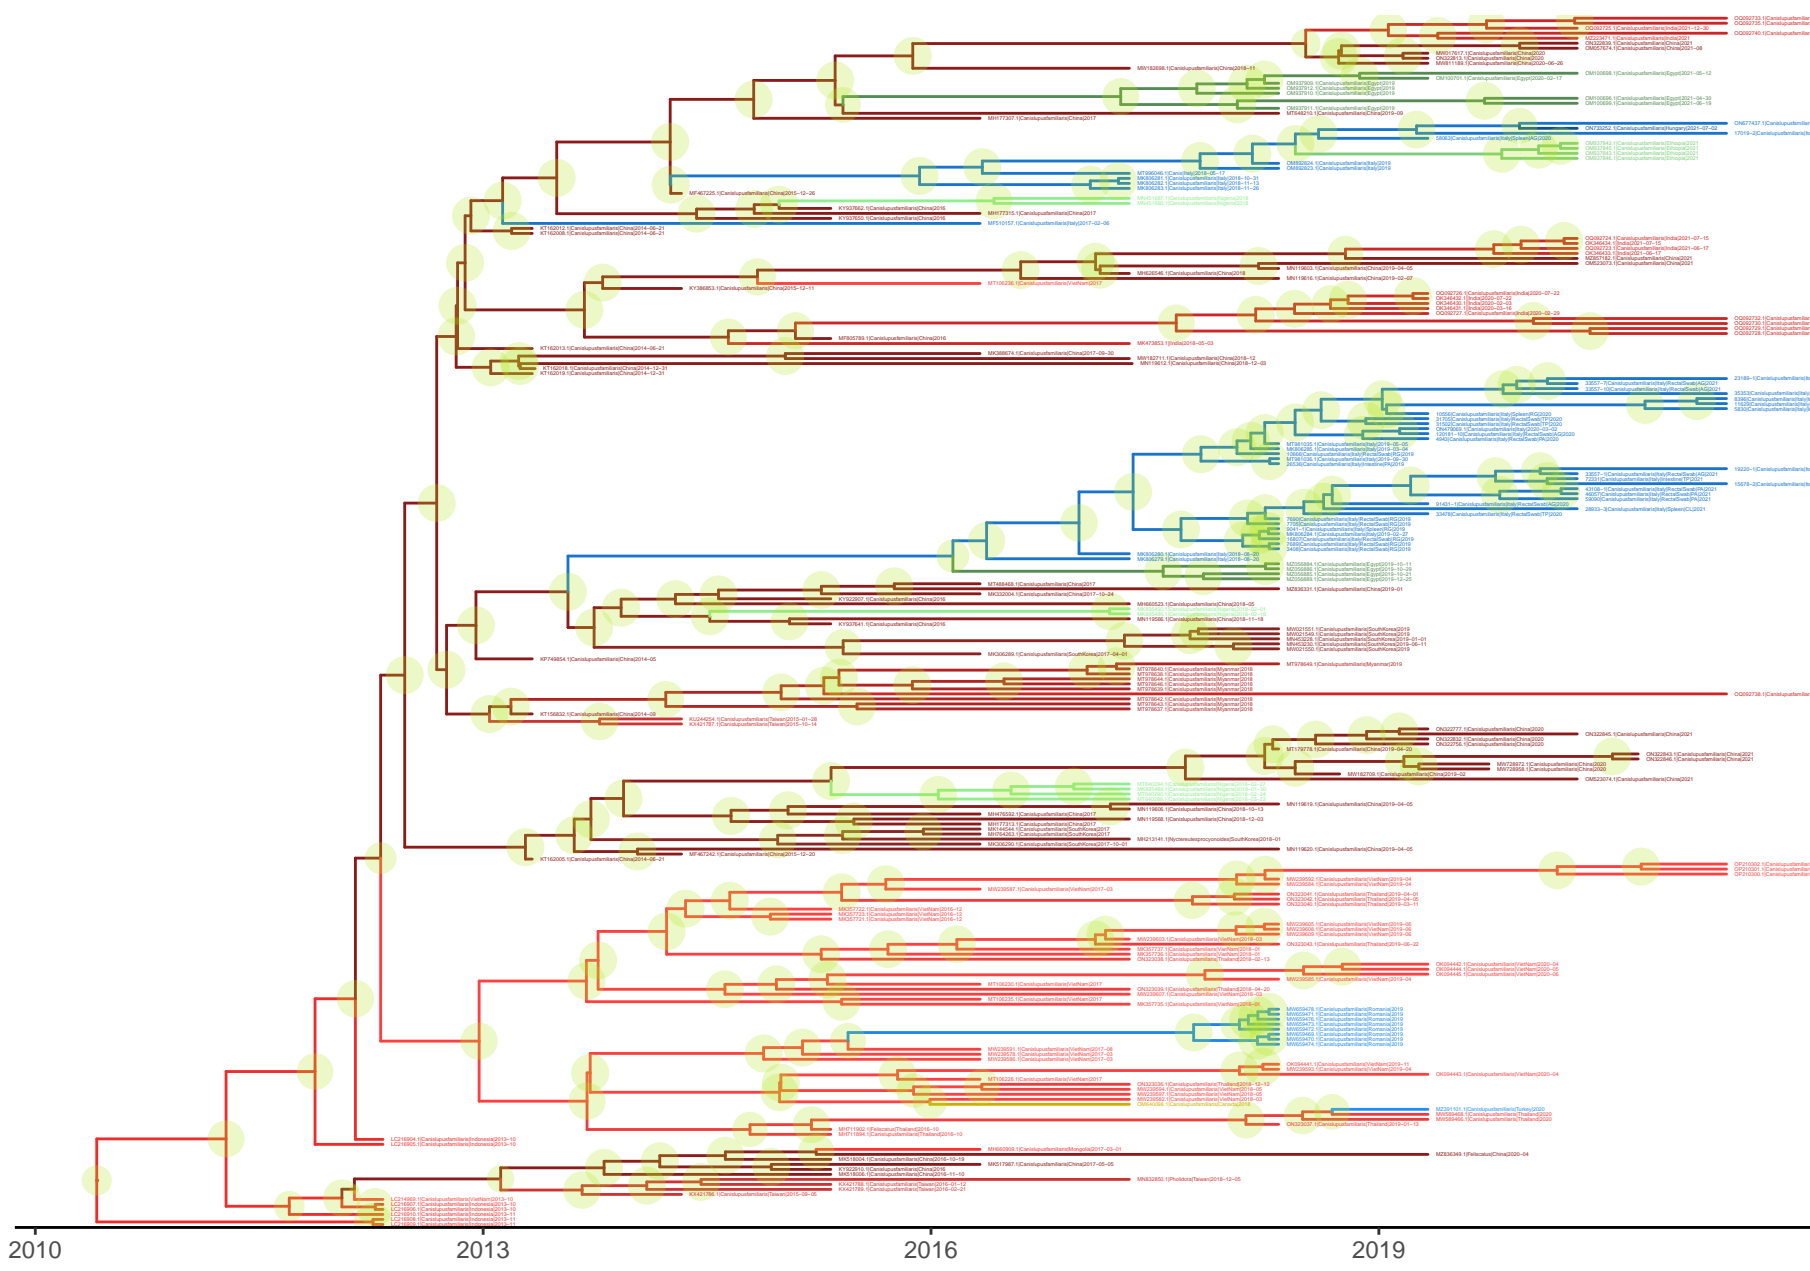

Dataset 5

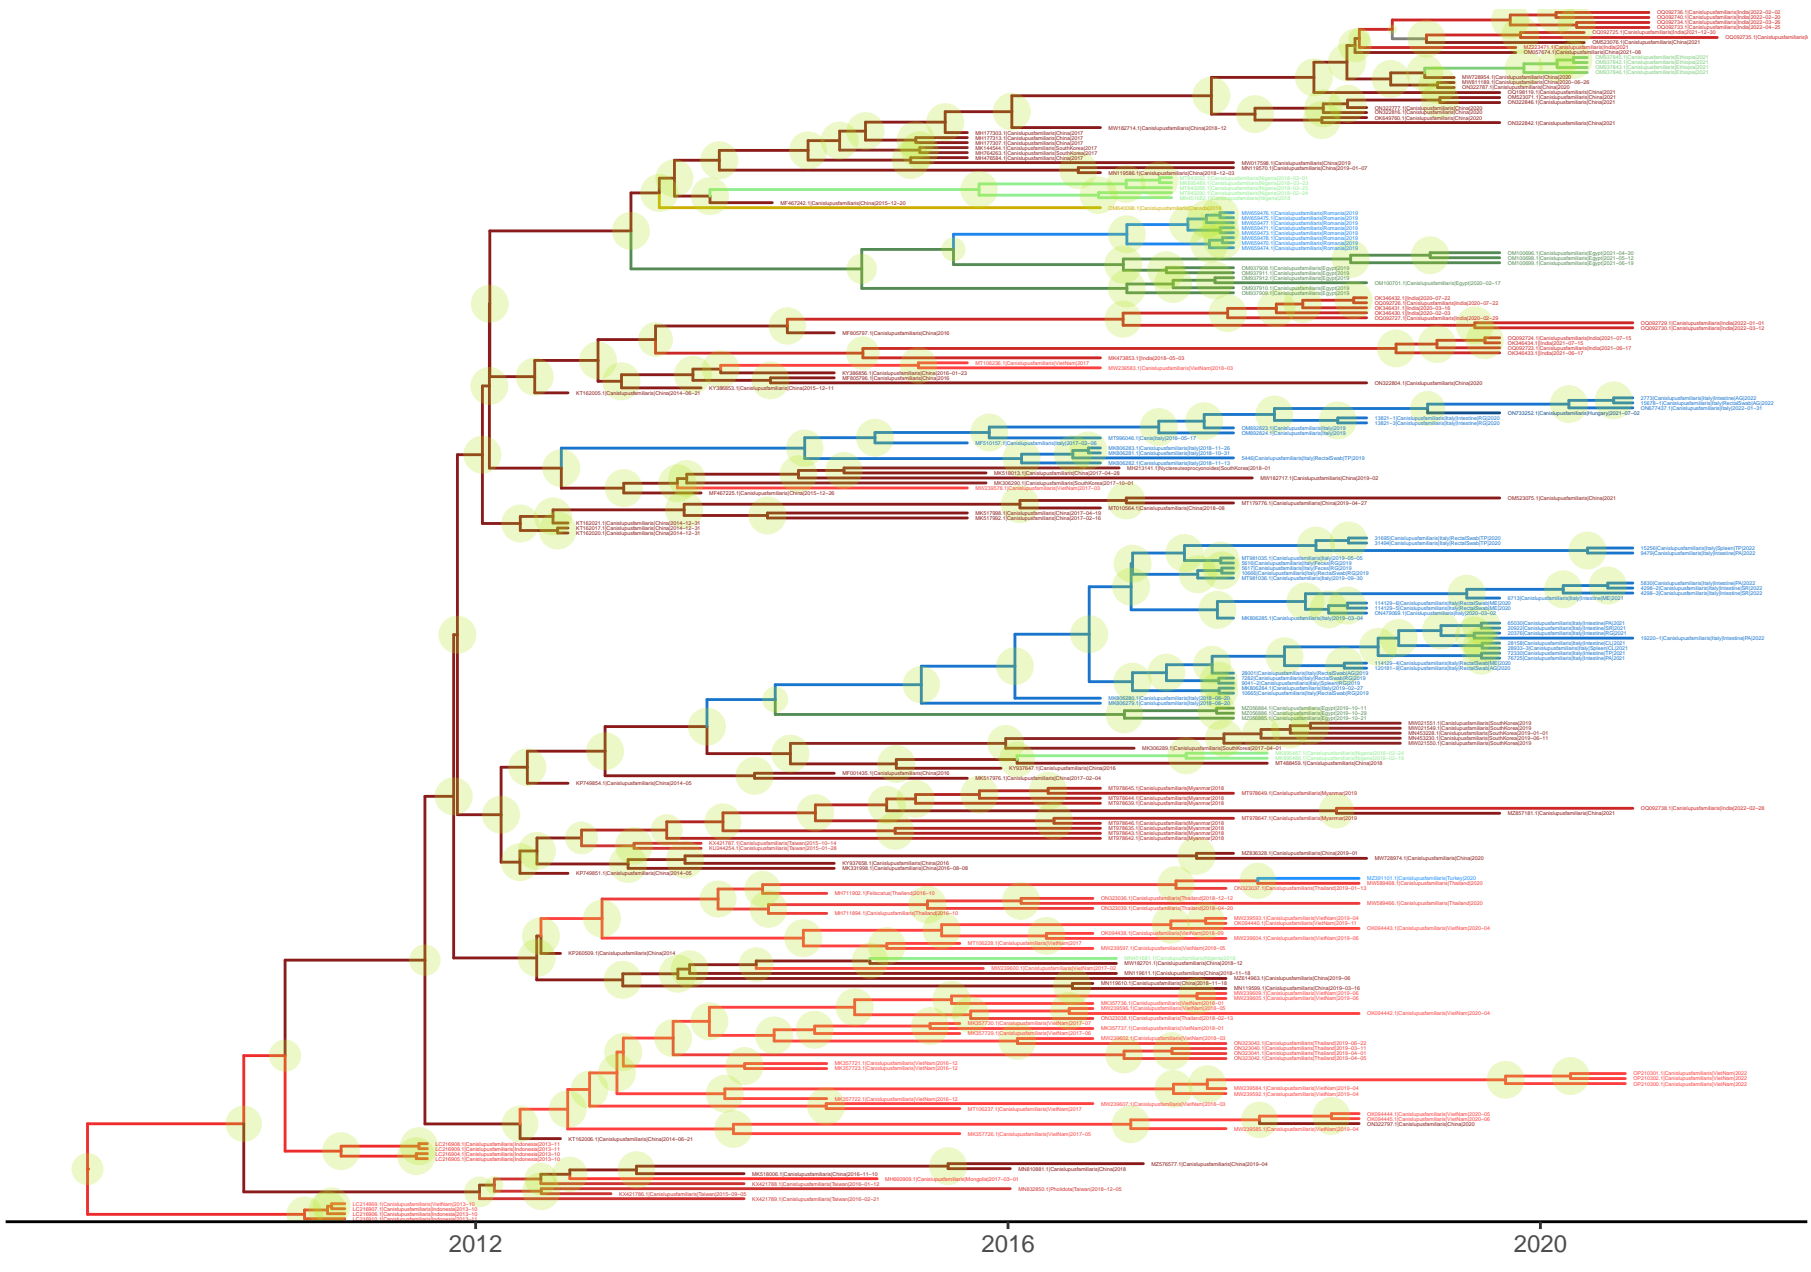

Dataset 6

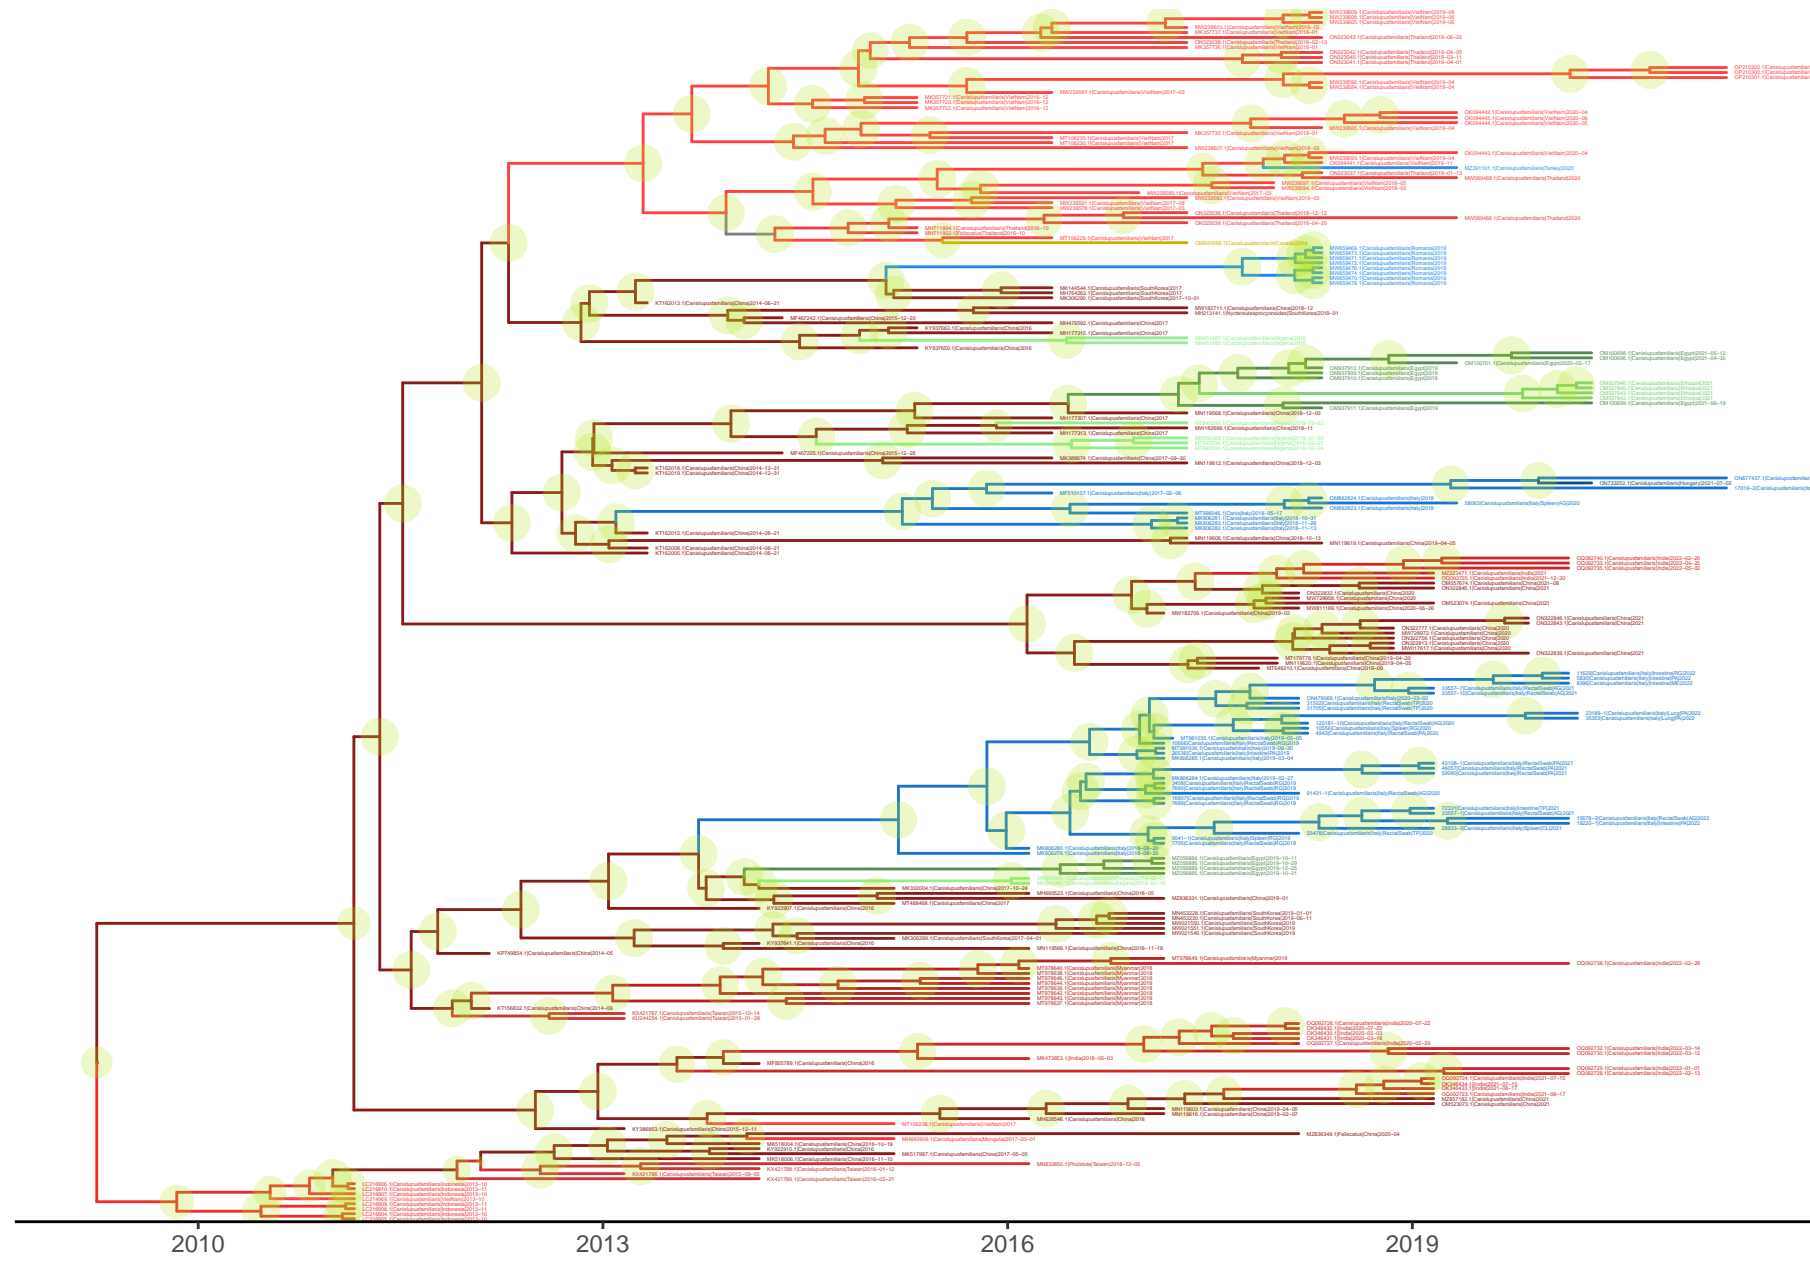

- Location
- Canada
  - China
  - Egypt
  - Ethiopia
  - Hungary
  - India
  - Indonesia
  - Italy
  - Mongolia
  - Myanmar
  - Nigeria
  - Romania
  - SouthKorea
  - Taiwan
  - Thailand
  - Turkey
  - VietNam
- Location.prob
- 0.7
  - 0.8
  - 0.9
  - 1.0
