# Supplementary material for: Not Asian Anymore: Reconstruction of the History, Evolution, and Dispersal of the “Asian” Lineage of CPV-2c
Source: Viruses. 2023 Sep 20;15(9):1962. doi: 10.3390/v15091962 (PMC10535194; doi:10.3390/v15091962)
Supplement: Supplementary file 1 [file viruses-15-01962-s001.zip › SupplementaryFile.xlsx]

## Sheet: List
Accession number	Region	NS1630P	VP2-324I/297A/267Y/440T	Type	Host	Country	Year	Notes	Strain
KP749870	NS1	1			Dog	China	2014		Canine parvovirus isolate WANGQING-1
KR002800	CG	1		a (N)	Dog	China	2014	Asian only in NS1	Canine parvovirus 2a strain CPV/CN/LN1/2014
OR463583	VP2		1	c (E)	Dog	Italy	2022		Protoparvovirus carnivoran1 strain CPV-2c_IZSSI_2022PA35353
OR463584	VP2		1	c (E)	Dog	Italy	2022		Protoparvovirus carnivoran1 strain CPV-2c_IZSSI_2022PA29683
OR463585	VP2		1	c (E)	Dog	Italy	2021		Protoparvovirus carnivoran1 strain CPV-2c_IZSSI_2021PA66355idBN
OR463586	VP2		1	c (E)	Dog	Italy	2021		Protoparvovirus carnivoran1 strain CPV-2c_IZSSI_2021PA66355idMa
OR463587	VP2		1	c (E)	Dog	Italy	2021		Protoparvovirus carnivoran1 strain CPV-2c_IZSSI_2021BA6713
OR463588	VP2		1	c (E)	Dog	Italy	2022		Protoparvovirus carnivoran1 strain CPV-2c_IZSSI_2022BA8396
OR463589	VP2		1	c (E)	Dog	Italy	2022		Protoparvovirus carnivoran1 strain CPV-2c_IZSSI_2022CT4298id1
OR463590	VP2		1	c (E)	Dog	Italy	2022		Protoparvovirus carnivoran1 strain CPV-2c_IZSSI_2022CT4298id2
OR463591	VP2		1	c (E)	Dog	Italy	2022		Protoparvovirus carnivoran1 strain CPV-2c_IZSSI_2022CT4298id3
OR463592	VP2		1	c (E)	Dog	Italy	2021		Protoparvovirus carnivoran1 strain CPV-2c_IZSSI_2021CT48
OR463593	VP2		1	c (E)	Dog	Italy	2019		Protoparvovirus carnivoran1 strain CPV-2c_IZSSI_2019PA10423
OR463594	VP2		1	c (E)	Dog	Italy	2022		Protoparvovirus carnivoran1 strain CPV-2c_IZSSI_2022PA11368idTrF
OR463595	VP2		1	c (E)	Dog	Italy	2022		Protoparvovirus carnivoran1 strain CPV-2c_IZSSI_2022PA11368idTrM
OR463596	VP2		1	c (E)	Dog	Italy	2020		Protoparvovirus carnivoran1 strain CPV-2c_IZSSI_2020PA114129idFri
OR463597	VP2		1	c (E)	Dog	Italy	2020		Protoparvovirus carnivoran1 strain CPV-2c_IZSSI_2020PA114129idMir
OR463598	VP2		1	c (E)	Dog	Italy	2020		Protoparvovirus carnivoran1 strain CPV-2c_IZSSI_2020PA114129idDan
OR463599	VP2		1	c (E)	Dog	Italy	2020		Protoparvovirus carnivoran1 strain CPV-2c_IZSSI_2020PA114129idPum
OR463600	VP2		1	c (E)	Dog	Italy	2020		Protoparvovirus carnivoran1 strain CPV-2c_IZSSI_2020PA120181idBil
OR463601	VP2		1	c (E)	Dog	Italy	2020		Protoparvovirus carnivoran1 strain CPV-2c_IZSSI_2020PA120181idMol
OR463602	VP2		1	c (E)	Dog	Italy	2020		Protoparvovirus carnivoran1 strain CPV-2c_IZSSI_2020PA120181idPip
OR463603	VP2		1	c (E)	Dog	Italy	2020		Protoparvovirus carnivoran1 strain CPV-2c_IZSSI_2020PA120181idSch
OR463604	VP2		1	c (E)	Dog	Italy	2022		Protoparvovirus carnivoran1 strain CPV-2c_IZSSI_2022PA15256
OR463605	VP2		1	c (E)	Dog	Italy	2022		Protoparvovirus carnivoran1 strain CPV-2c_IZSSI_2022PA15678idAlM
OR463606	VP2		1	c (E)	Dog	Italy	2022		Protoparvovirus carnivoran1 strain CPV-2c_IZSSI_2022PA15678idMeM
OR463607	VP2		1	b (D)	Dog	Italy	2022		Protoparvovirus carnivoran1 strain CPV-2b_IZSSI_2022PA15678idMeF
OR463608	VP2		1	c (E)	Dog	Italy	2022		Protoparvovirus carnivoran1 strain CPV-2c_IZSSI_2022PA17019idC1
OR463609	VP2		1	c (E)	Dog	Italy	2022		Protoparvovirus carnivoran1 strain CPV-2c_IZSSI_2022PA17019idC2
OR463610	VP2		1	c (E)	Dog	Italy	2022		Protoparvovirus carnivoran1 strain CPV-2c_IZSSI_2022PA19220idC1
OR463611	VP2		1	c (E)	Dog	Italy	2022		Protoparvovirus carnivoran1 strain CPV-2c_IZSSI_2022PA19220idC2
OR463612	VP2		1	c (E)	Dog	Italy	2022		Protoparvovirus carnivoran1 strain CPV-2c_IZSSI_2022PA20679
OR463613	VP2		1	c (E)	Dog	Italy	2022		Protoparvovirus carnivoran1 strain CPV-2c_IZSSI_2022PA23189idC1
OR463614	VP2		1	c (E)	Dog	Italy	2022		Protoparvovirus carnivoran1 strain CPV-2c_IZSSI_2022PA23189idC2
OR463615	VP2		1	c (E)	Dog	Italy	2022		Protoparvovirus carnivoran1 strain CPV-2c_IZSSI_2022PA23976
OR463616	VP2		1	c (E)	Dog	Italy	2019		Protoparvovirus carnivoran1 strain CPV-2c_IZSSI_2019PA28001
OR463617	VP2		1	c (E)	Dog	Italy	2019		Protoparvovirus carnivoran1 strain CPV-2c_IZSSI_2019PA28005
OR463618	VP2		1	c (E)	Dog	Italy	2019		Protoparvovirus carnivoran1 strain CPV-2c_IZSSI_2019PA28014
OR463619	VP2		1	c (E)	Dog	Italy	2021		Protoparvovirus carnivoran1 strain CPV-2c_IZSSI_2021PA28933id2192
OR463620	VP2		1	c (E)	Dog	Italy	2021		Protoparvovirus carnivoran1 strain CPV-2c_IZSSI_2021PA28933id2393
OR463621	VP2		1	c (E)	Dog	Italy	2021		Protoparvovirus carnivoran1 strain CPV-2c_IZSSI_2021PA28933id7022
OR463622	VP2		1	c (E)	Dog	Italy	2021		Protoparvovirus carnivoran1 strain CPV-2c_IZSSI_2021PA28933id3272
OR463623	VP2		1	c (E)	Dog	Italy	2022		Protoparvovirus carnivoran1 strain CPV-2c_IZSSI_2022PA30172idC1
OR463624	VP2		1	c (E)	Dog	Italy	2022		Protoparvovirus carnivoran1 strain CPV-2c_IZSSI_2022PA30172idC2
OR463625	VP2		1	c (E)	Dog	Italy	2019		Protoparvovirus carnivoran1 strain CPV-2c_IZSSI_2019PA30246
OR463626	VP2		1	c (E)	Dog	Italy	2022		Protoparvovirus carnivoran1 strain CPV-2c_IZSSI_2022PA30325
OR463627	VP2		1	c (E)	Dog	Italy	2019		Protoparvovirus carnivoran1 strain CPV-2c_IZSSI_2019PA30399
OR463628	VP2		1	c (E)	Dog	Italy	2020		Protoparvovirus carnivoran1 strain CPV-2c_IZSSI_2020PA31487
OR463629	VP2		1	c (E)	Dog	Italy	2020		Protoparvovirus carnivoran1 strain CPV-2c_IZSSI_2020PA31494
OR463630	VP2		1	c (E)	Dog	Italy	2020		Protoparvovirus carnivoran1 strain CPV-2c_IZSSI_2020PA31502
OR463631	VP2		1	c (E)	Dog	Italy	2020		Protoparvovirus carnivoran1 strain CPV-2c_IZSSI_2020PA31566
OR463632	VP2		1	c (E)	Dog	Italy	2020		Protoparvovirus carnivoran1 strain CPV-2c_IZSSI_2020PA31580
OR463633	VP2		1	c (E)	Dog	Italy	2020		Protoparvovirus carnivoran1 strain CPV-2c_IZSSI_2020PA31695
OR463634	VP2		1	c (E)	Dog	Italy	2020		Protoparvovirus carnivoran1 strain CPV-2c_IZSSI_2020PA31705
OR463635	VP2		1	c (E)	Dog	Italy	2020		Protoparvovirus carnivoran1 strain CPV-2c_IZSSI_2020PA33477
OR463636	VP2		1	c (E)	Dog	Italy	2020		Protoparvovirus carnivoran1 strain CPV-2c_IZSSI_2020PA33478
OR463637	VP2		1	c (E)	Dog	Italy	2021		Protoparvovirus carnivoran1 strain CPV-2c_IZSSI_2021PA33557idAro
OR463638	VP2		1	c (E)	Dog	Italy	2021		Protoparvovirus carnivoran1 strain CPV-2c_IZSSI_2021PA33557idBia
OR463639	VP2		1	c (E)	Dog	Italy	2021		Protoparvovirus carnivoran1 strain CPV-2c_IZSSI_2021PA33557idChe
OR463640	VP2		1	c (E)	Dog	Italy	2021		Protoparvovirus carnivoran1 strain CPV-2c_IZSSI_2021PA33557idCod
OR463641	VP2		1	c (E)	Dog	Italy	2021		Protoparvovirus carnivoran1 strain CPV-2c_IZSSI_2021PA33557idFly
OR463642	VP2		1	c (E)	Dog	Italy	2021		Protoparvovirus carnivoran1 strain CPV-2c_IZSSI_2021PA33557idMad
OR463643	VP2		1	c (E)	Dog	Italy	2021		Protoparvovirus carnivoran1 strain CPV-2c_IZSSI_2021PA33557idMie
OR463644	VP2		1	c (E)	Dog	Italy	2021		Protoparvovirus carnivoran1 strain CPV-2c_IZSSI_2021PA33557idNev
OR463645	VP2		1	c (E)	Dog	Italy	2021		Protoparvovirus carnivoran1 strain CPV-2c_IZSSI_2021PA33557idPan
OR463646	VP2		1	c (E)	Dog	Italy	2021		Protoparvovirus carnivoran1 strain CPV-2c_IZSSI_2021PA33557idRos
OR463647	VP2		1	c (E)	Dog	Italy	2021		Protoparvovirus carnivoran1 strain CPV-2c_IZSSI_2021PA33557idTer
OR463648	VP2		1	c (E)	Dog	Italy	2021		Protoparvovirus carnivoran1 strain CPV-2c_IZSSI_2021PA33557idTom
OR463649	VP2		1	c (E)	Dog	Italy	2019		Protoparvovirus carnivoran1 strain CPV-2c_IZSSI_2019PA34092idF
OR463650	VP2		1	c (E)	Dog	Italy	2019		Protoparvovirus carnivoran1 strain CPV-2c_IZSSI_2019PA34092idM
OR463651	VP2		1	c (E)	Dog	Italy	2020		Protoparvovirus carnivoran1 strain CPV-2c_IZSSI_2020PA41526
OR463652	VP2		1	c (E)	Dog	Italy	2020		Protoparvovirus carnivoran1 strain CPV-2c_IZSSI_2020PA41529
OR463653	VP2		1	c (E)	Dog	Italy	2020		Protoparvovirus carnivoran1 strain CPV-2c_IZSSI_2020PA41531
OR463654	VP2		0	c (E)	Dog	Italy	2021	440A	Protoparvovirus carnivoran1 strain CPV-2c_IZSSI_2021PA43108idAki
OR463655	VP2		0	c (E)	Dog	Italy	2021	440A	Protoparvovirus carnivoran1 strain CPV-2c_IZSSI_2021PA43108idAlt
OR463656	VP2		1	c (E)	Dog	Italy	2020		Protoparvovirus carnivoran1 strain CPV-2c_IZSSI_2020PA43764
OR463657	VP2		1	c (E)	Dog	Italy	2020		Protoparvovirus carnivoran1 strain CPV-2c_IZSSI_2020PA43940
OR463658	VP2		1	c (E)	Dog	Italy	2020		Protoparvovirus carnivoran1 strain CPV-2c_IZSSI_2020PA53415
OR463659	VP2		1	c (E)	Dog	Italy	2022		Protoparvovirus carnivoran1 strain CPV-2c_IZSSI_2022PA5830
OR463660	VP2		0	c (E)	Dog	Italy	2021	440A	Protoparvovirus carnivoran1 strain CPV-2c_IZSSI_2021PA59090
OR463661	VP2		1	c (E)	Dog	Italy	2022		Protoparvovirus carnivoran1 strain CPV-2c_IZSSI_2022PA5934
OR463662	VP2		1	c (E)	Dog	Italy	2021		Protoparvovirus carnivoran1 strain CPV-2c_IZSSI_2021PA59943
OR463663	VP2		1	c (E)	Dog	Italy	2021		Protoparvovirus carnivoran1 strain CPV-2c_IZSSI_2021PA65030
OR463664	VP2		1	c (E)	Dog	Italy	2021		Protoparvovirus carnivoran1 strain CPV-2c_IZSSI_2021PA65736
OR463665	VP2		1	c (E)	Dog	Italy	2021		Protoparvovirus carnivoran1 strain CPV-2c_IZSSI_2021PA72330
OR463666	VP2		1	c (E)	Dog	Italy	2021		Protoparvovirus carnivoran1 strain CPV-2c_IZSSI_2021PA72331
OR463667	VP2		1	c (E)	Dog	Italy	2021		Protoparvovirus carnivoran1 strain CPV-2c_IZSSI_2021PA72332
OR463668	VP2		1	c (E)	Dog	Italy	2021		Protoparvovirus carnivoran1 strain CPV-2c_IZSSI_2021PA76725
OR463669	VP2		1	c (E)	Dog	Italy	2021		Protoparvovirus carnivoran1 strain CPV-2c_IZSSI_2021PA80418
OR463670	VP2		1	c (E)	Dog	Italy	2020		Protoparvovirus carnivoran1 strain CPV-2c_IZSSI_2020PA91431IdMin
OR463671	VP2		1	c (E)	Dog	Italy	2020		Protoparvovirus carnivoran1 strain CPV-2c_IZSSI_2020PA91431IdMol
OR463672	VP2		1	c (E)	Dog	Italy	2022		Protoparvovirus carnivoran1 strain CPV-2c_IZSSI_2022PA9479
OR463673	VP2		1	c (E)	Dog	Italy	2020		Protoparvovirus carnivoran1 strain CPV-2c_IZSSI_2020RG10556
OR463674	VP2		1	c (E)	Dog	Italy	2019		Protoparvovirus carnivoran1 strain CPV-2c_IZSSI_2019RG10661
OR463675	VP2		1	c (E)	Dog	Italy	2019		Protoparvovirus carnivoran1 strain CPV-2c_IZSSI_2019RG10662
OR463676	VP2		1	c (E)	Dog	Italy	2019		Protoparvovirus carnivoran1 strain CPV-2c_IZSSI_2019RG10663
OR463677	VP2		1	c (E)	Dog	Italy	2019		Protoparvovirus carnivoran1 strain CPV-2c_IZSSI_2019RG10665
OR463678	VP2		1	c (E)	Dog	Italy	2019		Protoparvovirus carnivoran1 strain CPV-2c_IZSSI_2019RG10666
OR463679	VP2		1	c (E)	Dog	Italy	2022		Protoparvovirus carnivoran1 strain CPV-2c_IZSSI_2022RG11629
OR463680	VP2		1	c (E)	Dog	Italy	2019		Protoparvovirus carnivoran1 strain CPV-2c_IZSSI_2019RG12480
OR463681	VP2		1	c (E)	Dog	Italy	2020		Protoparvovirus carnivoran1 strain CPV-2c_IZSSI_2020RG13821id1
OR463682	VP2		1	c (E)	Dog	Italy	2020		Protoparvovirus carnivoran1 strain CPV-2c_IZSSI_2020RG13821id2
OR463683	VP2		1	c (E)	Dog	Italy	2019		Protoparvovirus carnivoran1 strain CPV-2c_IZSSI_2019RG16804id1
OR463684	VP2		1	c (E)	Dog	Italy	2019		Protoparvovirus carnivoran1 strain CPV-2c_IZSSI_2019RG16804id2
OR463685	VP2		1	c (E)	Dog	Italy	2019		Protoparvovirus carnivoran1 strain CPV-2c_IZSSI_2019RG16806
OR463686	VP2		1	c (E)	Dog	Italy	2019		Protoparvovirus carnivoran1 strain CPV-2c_IZSSI_2019RG16807
OR463687	VP2		1	c (E)	Dog	Italy	2019		Protoparvovirus carnivoran1 strain CPV-2c_IZSSI_2019RG16810
OR463688	VP2		1	c (E)	Dog	Italy	2021		Protoparvovirus carnivoran1 strain CPV-2c_IZSSI_2021RG20376
OR463689	VP2		1	c (E)	Dog	Italy	2021		Protoparvovirus carnivoran1 strain CPV-2c_IZSSI_2021RG20922
OR463690	VP2		1	c (E)	Dog	Italy	2019		Protoparvovirus carnivoran1 strain CPV-2c_IZSSI_2019RG5615
OR463691	VP2		1	c (E)	Dog	Italy	2019		Protoparvovirus carnivoran1 strain CPV-2c_IZSSI_2019RG5616
OR463692	VP2		1	c (E)	Dog	Italy	2019		Protoparvovirus carnivoran1 strain CPV-2c_IZSSI_2019RG5617
OR463693	VP2		1	c (E)	Dog	Italy	2019		Protoparvovirus carnivoran1 strain CPV-2c_IZSSI_2019RG7278
OR463694	VP2		1	c (E)	Dog	Italy	2019		Protoparvovirus carnivoran1 strain CPV-2c_IZSSI_2019RG7282
OR463695	VP2		1	c (E)	Dog	Italy	2019		Protoparvovirus carnivoran1 strain CPV-2c_IZSSI_2019RG7687
OR463696	VP2		1	c (E)	Dog	Italy	2019		Protoparvovirus carnivoran1 strain CPV-2c_IZSSI_2019RG7689
OR463697	VP2		1	c (E)	Dog	Italy	2019		Protoparvovirus carnivoran1 strain CPV-2c_IZSSI_2019RG7690
OR463698	VP2		1	c (E)	Dog	Italy	2019		Protoparvovirus carnivoran1 strain CPV-2c_IZSSI_2019RG7705
OR463699	VP2		1	c (E)	Dog	Italy	2019		Protoparvovirus carnivoran1 strain CPV-2c_IZSSI_2019RG9041idC1
OR463700	VP2		1	c (E)	Dog	Italy	2019		Protoparvovirus carnivoran1 strain CPV-2c_IZSSI_2019RG9041idC2
OR463701	VP2		1	c (E)	Dog	Italy	2021		Protoparvovirus carnivoran1 strain CPV-2c_IZSSI_2021RG19176
KP260509	VP2		1	c (E)	Dog	China	2014		Canine parvovirus 2c isolate BJ14-9
KP749851	VP2		1	c (E)	Dog	China	2014		Canine parvovirus isolate WANGQING-1
KP749854	VP2		1	c (E)	Dog	China	2014		Canine parvovirus isolate YANJI-1
KR611522	VP2		1	c (E)	Dog	China	2014		Canine parvovirus isolate CPV-SD-14-12
KT156832	VP2		1	c (E)	Dog	China	2014		Canine parvovirus strain HRB-A6
KT162005	VP2		1	c (E)	Dog	China	2014		Canine parvovirus isolate BJ14-8
KT162006	VP2		1	c (E)	Dog	China	2014		Canine parvovirus isolate BJ14-11
KT162007	VP2		1	c (E)	Dog	China	2014		Canine parvovirus isolate BJ14-12
KT162008	VP2		1	c (E)	Dog	China	2014		Canine parvovirus isolate BJ14-13
KT162009	VP2		1	c (E)	Dog	China	2014		Canine parvovirus isolate BJ14-17
KT162010	VP2		1	c (E)	Dog	China	2014		Canine parvovirus isolate BJ14-18
KT162011	VP2		1	c (E)	Dog	China	2014		Canine parvovirus isolate BJ14-20
KT162012	VP2		1	c (E)	Dog	China	2014		Canine parvovirus isolate BJ14-21
KT162013	VP2		1	c (E)	Dog	China	2014		Canine parvovirus isolate BJ14-22
KT162014	VP2		1	c (E)	Dog	China	2014		Canine parvovirus isolate BJ14-32
KT162015	VP2		1	c (E)	Dog	China	2014		Canine parvovirus isolate BJ14-33
KT162016	VP2		1	c (E)	Dog	China	2014		Canine parvovirus isolate BJ14-34
KT162017	VP2		1	c (E)	Dog	China	2014		Canine parvovirus isolate BJ14-35
KT162018	VP2		1	c (E)	Dog	China	2014		Canine parvovirus isolate BJ14-36
KT162019	VP2		1	c (E)	Dog	China	2014		Canine parvovirus isolate BJ14-37
KT162020	VP2		1	c (E)	Dog	China	2014		Canine parvovirus isolate BJ14-38
KT162021	VP2		1	c (E)	Dog	China	2014		Canine parvovirus isolate BJ14-39
KU244254	VP2		1	c (E)	Dog	Taiwan	2015		Canine parvovirus 2c
KX421786	VP2		1	c (E)	Dog	Taiwan	2015		Canine parvovirus 2 isolate C104-166/15 VP2
KX421787	VP2		1	c (E)	Dog	Taiwan	2015		Canine parvovirus 2 isolate C104-216/15
KX421788	VP2		1	c (E)	Dog	Taiwan	2016		Canine parvovirus 2 isolate C105-013/16
KX421789	VP2		1	c (E)	Dog	Taiwan	2016		Canine parvovirus 2 isolate C105-030/16
KY083092	VP2		1	c (E)		Singapore	2014		Protoparvovirus sp. strain M22-6
KY083093	VP2		1	c (E)		Singapore	2014		Protoparvovirus sp. strain M26-6
KY083095	VP2		1	c (E)		Singapore	2014		Protoparvovirus sp. strain M131-6
KY386853	VP2		1	c (E)	Dog	China	2015		Canine parvovirus isolate GY-4
KY386856	VP2		1	c (E)	Dog	China	2016		Canine parvovirus isolate GY-7
KY386857	VP2		1	c (E)	Dog	China	2016		Canine parvovirus isolate GY-8
KY922907	VP2		1	c (E)	Dog	China	2016		Canine parvovirus strain ShangHai/0-1DN/2016
KY922910	VP2		1	c (E)	Dog	China	2016		Canine parvovirus strain ShangHai/03-1/2016
KY937637	VP2		1	c (E)	Dog	China	2016		Canine parvovirus strain shanghai/03g/2016
KY937641	VP2		1	c (E)	Dog	China	2016		Canine parvovirus strain ShangHai/3 2 1/2016
KY937647	VP2		1	c (E)	Dog	China	2016		Canine parvovirus strain Shenzhen/11/2016
KY937648	VP2		1	c (E)	Dog	China	2016		Canine parvovirus strain Shenzhen/12/2016
KY937650	VP2		1	c (E)	Dog	China	2016		Canine parvovirus strain GuangZhou/B/2016
KY937651	VP2		1	c (E)	Dog	China	2017		Canine parvovirus strain xuzhou/BJ2/2017
KY937655	VP2		1	c (E)	Dog	China	2017		Canine parvovirus strain xuzhou/BJ18/2017
KY937658	VP2		1	c (E)	Dog	China	2016		Canine parvovirus strain GuangZhou/F3 2/2016
KY937662	VP2		1	c (E)	Dog	China	2016		Canine parvovirus strain Shenzhen/H1/2016
LC214969	CG	1	1	c (E)	Dog	Viet Nam	2013		Canine parvovirus 2c strain CPV/dog/HCM/7/2013
LC216904	VP2		1	c (E)	Dog	Indonesia	2013		Canine parvovirus 2c strain CPV/dog/HCM/2/2013
LC216905	VP2		1	c (E)	Dog	Indonesia	2013		Canine parvovirus 2c strain CPV/dog/HCM/5/2013
LC216906	VP2		1	c (E)	Dog	Indonesia	2013		Canine parvovirus 2c strain CPV/dog/HCM/6/2013
LC216907	VP2		1	c (E)	Dog	Indonesia	2013		Canine parvovirus 2c strain CPV/dog/HCM/8/2013
LC216908	VP2		1	c (E)	Dog	Indonesia	2013		Canine parvovirus 2c strain CPV/dog/HCM/13/2013
LC216909	VP2		1	c (E)	Dog	Indonesia	2013		Canine parvovirus 2c strain CPV/dog/HCM/14/2013
LC216910	VP2		1	c (E)	Dog	Indonesia	2013		Canine parvovirus 2c strain CPV/dog/HCM/20/2013
MF001435	VP2		1	c (E)	Canine	China	2016		Canine parvovirus 2c strain CPV/CN/YZ1/2016
MF001436	VP2		1	c (E)	Canine	China	2016		Canine parvovirus 2c strain CPV/CN/YZ3/2016
MF001437	VP2		1	c (E)	Canine	China	2016		Canine parvovirus 2c strain CPV/CN/YZ8/2016
MF347723	VP2		1	c (E)	Dog	China	2016		Canine parvovirus isolate 20160810 BJ 8
MF347724	VP2		1	c (E)	Dog	China	2017		Canine parvovirus isolate 20170322 BJ 26
MF347725	VP2		1	c (E)	Dog	China	2017		Canine parvovirus isolate 20170405 BJ K
MF467225	VP2		1	c (E)	Dog	China	2015		Canine parvovirus isolate CPV JS1592
MF467229	VP2		1	c (E)	Dog	China	2016		Canine parvovirus isolate CPV HN1617
MF467242	VP2		1	c (E)	Dog	China	2015		Canine parvovirus isolate CPV GX158VP2
MF510157	CG	1	1	c (E)	Dog	Italy	2017		Canine parvovirus strain CPV IZSSI 2743 17
MF805789	CG	1	1	c (E)	Canine	China	2016		Canine parvovirus strain Canine/China/01/2016
MF805792	CG	1	1	c (E)	Canine	China	2016		Canine parvovirus strain Canine/China/04/2016
MF805795	CG	1	1	c (E)	Canine	China	2016		Canine parvovirus strain Canine/China/07/2016
MF805796	CG	1	1	c (E)	Canine	China	2016		Canine parvovirus strain Canine/China/08/2016
MF805797	CG	1	1	c (E)	Canine	China	2016		Canine parvovirus strain Canine/China/09/2016
MF918379	VP2		1	c (E)	Dog	China			Canine parvovirus isolate GX 14
MF918390	VP2		1	c (E)	Dog	China			Canine parvovirus isolate GX 4
MG013488	CG	1	1	c (E)	Dog	China	2017		Canine parvovirus isolate CPV SH1516
MH106700	CG	0	0	c (E)	Dog	China	2016	440A, Asian only in VP2	Canine parvovirus isolate CPV-BJL3
MH155193	VP2		1	c (E)	Canine	China	2017		Canine parvovirus isolate CPV/canine/LZ/2/2017
MH177303	VP2		1	c (E)	Dog	China	2017		Canine parvovirus 2 isolate GX345
MH177304	VP2		1	c (E)	Dog	China	2017		Canine parvovirus 2 isolate GX337
MH177305	VP2		1	c (E)	Dog	China	2017		Canine parvovirus 2 isolate GX373
MH177306	VP2		1	c (E)	Dog	China	2017		Canine parvovirus 2 isolate GX372
MH177307	VP2		1	c (E)	Dog	China	2017		Canine parvovirus 2 isolate GX357
MH177308	VP2		1	c (E)	Dog	China	2017		Canine parvovirus 2 isolate GX356
MH177309	VP2		1	c (E)	Dog	China	2017		Canine parvovirus 2 isolate GX349
MH177310	VP2		1	c (E)	Dog	China	2017		Canine parvovirus 2 isolate GX324
MH177311	VP2		1	c (E)	Dog	China	2017		Canine parvovirus isolate GX306
MH177312	VP2		1	c (E)	Dog	China	2017		Canine parvovirus 2 isolate GX305
MH177313	VP2		1	c (E)	Dog	China	2017		Canine parvovirus 2 isolate GX303
MH177314	VP2		1	c (E)	Dog	China	2017		Canine parvovirus 2 isolate GX302
MH177315	VP2		1	c (E)	Dog	China	2017		Canine parvovirus 2 isolate GX310
MH177316	VP2		1	c (E)	Dog	China	2017		Canine parvovirus 2 isolate GX308
MH177317	VP2		1	c (E)	Dog	China	2017		Canine parvovirus 2 isolate GX307
MH213141	VP2		1	c (E)	Raccoon dog	South Korea	2018		Canine parvovirus isolate 17Ra174
MH476581	CG	1	1	c (E)	Dog	China	2017		Canine parvovirus strain Canine/China/12/2017
MH476583	CG	1	1	c (E)	Dog	China	2017		Canine parvovirus strain Canine/China/14/2017
MH476584	CG	1	1	c (E)	Dog	China	2017		Canine parvovirus strain Canine/China/15/2017
MH476585	CG	1	1	c (E)	Dog	China	2017		Canine parvovirus strain Canine/China/16/2017
MH476587	CG	1	1	c (E)	Dog	China	2017		Canine parvovirus strain Canine/China/18/2017
MH476592	CG	1	1	c (E)	Dog	China	2017		Canine parvovirus strain Canine/China/23/2017
MH626544	VP2		1	c (E)	Dog	China	2018		Canine parvovirus isolate GX420
MH626546	VP2		1	c (E)	Dog	China	2018		Canine parvovirus isolate GX416
MH660523	VP2		1	a (N)	Canine	China	2018		Canine parvovirus strain NVP2
MH660525	VP2		1	c (E)	Canine	China	2018		Canine parvovirus strain N3 VP2
MH660909	CG	1	1	c (E)	Dog	Mongolia	2017		Canine parvovirus 2c strain 5 MGL
MH685923	VP2		1	c (E)	Dog	China	2014		Canine parvovirus 2c isolate SZ1412
MH711894	CG	1	1	c (E)	Dog	Thailand	2016		Canine parvovirus 2c strain CU24
MH711902	CG	1	1	c (E)	Cat	Thailand	2016		Canine parvovirus 2c strain CU2
MH764263	VP2		1	c (E)	Canine	South Korea	2017		Canine parvovirus 2c isolate K20172c
MK144544	CG	0	1	c (E)	Canine	South Korea	2017	Asian only in VP2	Canine parvovirus 2c isolate K01708
MK268682	VP2		1	c (E)	Canine	China	2018		Canine parvovirus 2c strain CPV 02
MK268683	VP2		1	b (D)	Canine	China	2018		Canine parvovirus 2b strain CPV 03
MK306289	CG	1	1	c (E)	Dog	South Korea	2017		Canine parvovirus isolate Korea CPV2c
MK306290	CG	1	1	c (E)	Dog	South Korea	2017		Canine parvovirus isolate Korea CPV2c 2
MK331997	VP2		1	c (E)	Dog	China	2016		Canine parvovirus isolate nn1687
MK331998	VP2		1	c (E)	Dog	China	2016		Canine parvovirus isolate nn1688
MK332000	VP2		1	c (E)	Dog	China	2016		Canine parvovirus isolate nn168113
MK332001	VP2		1	c (E)	Dog	China	2016		Canine parvovirus
MK332004	VP2		1	c (E)	Dog	China	2017		Canine parvovirus isolate nn171024
MK332007	VP2		1	c (E)	Dog	China	2017		Canine parvovirus isolate nn171105
MK357721	VP2		1	c (E)	Dog	Viet Nam	2016		Canine parvovirus strain DN8 VP2
MK357722	VP2		1	c (E)	Dog	Viet Nam	2016		Canine parvovirus strain DN18 VP2
MK357723	VP2		1	c (E)	Dog	Viet Nam	2016		Canine parvovirus strain DN26 VP2
MK357725	VP2		1	c (E)	Dog	Viet Nam	2017		Canine parvovirus strain HCM4 VP2
MK357726	VP2		1	c (E)	Dog	Viet Nam	2017		Canine parvovirus strain HCM16 VP2
MK357727	VP2		1	c (E)	Dog	Viet Nam	2017		Canine parvovirus strain HCM22 VP2
MK357728	VP2		1	c (E)	Dog	Viet Nam	2017		Canine parvovirus strain HCM25
MK357729	VP2		1	c (E)	Dog	Viet Nam	2017		Canine parvovirus strain HCM27
MK357730	VP2		1	c (E)	Dog	Viet Nam	2017		Canine parvovirus strain HCM32
MK357731	VP2		1	c (E)	Dog	Viet Nam	2017		Canine parvovirus strain HCM48
MK357732	VP2		1	c (E)	Dog	Viet Nam	2017		Canine parvovirus strain HCM50
MK357734	VP2		1	c (E)	Dog	Viet Nam	2017		Canine parvovirus strain HN7AA
MK357735	VP2		1	c (E)	Dog	Viet Nam	2018		Canine parvovirus strain HN4AA
MK357736	VP2		1	c (E)	Dog	Viet Nam	2018		Canine parvovirus strain HN11AA
MK357737	VP2		1	c (E)	Dog	Viet Nam	2018		Canine parvovirus strain HN37AA
MK388674	CG	1	1	c (E)	Dog	China	2017		Canine parvovirus isolate HB2017
MK473853	VP2		0	a (N)	Dog	India	2018	440A	Canine parvovirus isolate SKB/CPV 318
MK517966	VP2		1	c (E)	Canine	China	2016		Canine parvovirus isolate CN/HN160
MK517967	VP2		1	c (E)	Canine	China	2016		Canine parvovirus isolate CN/HN1602
MK517968	VP2		1	c (E)	Canine	China	2016		Canine parvovirus isolate CN/HN1603
MK517969	VP2		1	c (E)	Canine	China	2016		Canine parvovirus isolate CN/HN1604
MK517970	VP2		1	c (E)	Canine	China	2016		Canine parvovirus isolate CN/HN1605
MK517972	VP2		1	c (E)	Canine	China	2016		Canine parvovirus isolate CN/HN1607
MK517973	VP2		1	c (E)	Canine	China	2017		Canine parvovirus isolate CN/HN1708
MK517976	VP2		1	c (E)	Canine	China	2017		Canine parvovirus isolate CN/HN171
MK517978	VP2		1	c (E)	Canine	China	2017		Canine parvovirus isolate CN/HN1713
MK517979	VP2		1	c (E)	Canine	China	2017		Canine parvovirus isolate CN/HN1714
MK517981	VP2		1	c (E)	Canine	China	2017		Canine parvovirus isolate CN/HN1716
MK517986	VP2		1	c (E)	Canine	China	2017		Canine parvovirus isolate CN/HN172
MK517987	VP2		1	c (E)	Canine	China	2017		Canine parvovirus isolate CN/HN1722
MK517988	VP2		1	c (E)	Canine	China	2017		Canine parvovirus isolate CN/HN1723
MK517989	VP2		1	c (E)	Canine	China	2016		Canine parvovirus isolate CN/HB160
MK517990	VP2		1	c (E)	Canine	China	2016		Canine parvovirus isolate CN/HB1602
MK517991	VP2		1	c (E)	Canine	China	2016		Canine parvovirus isolate CN/HB1603
MK517992	VP2		0	c (E)	Dog	China	2017	440A	Canine parvovirus isolate CN/HB1704
MK517993	VP2		1	c (E)	Canine	China	2017		Canine parvovirus isolate CN/HB1705
MK517994	VP2		1	c (E)	Canine	China	2017		Canine parvovirus isolate CN/HB1706
MK517996	VP2		1	c (E)	Canine	China	2017		Canine parvovirus isolate CN/HB1708
MK517997	VP2		1	c (E)	Canine	China	2017		Canine parvovirus isolate CN/HB1709
MK517998	VP2		1	c (E)	Canine	China	2017		Canine parvovirus isolate CN/HB1710
MK517999	VP2		1	c (E)	Canine	China	2017		Canine parvovirus isolate CN/HB171
MK518001	VP2		0	c (E)	Dog	China	2017	324L	Canine parvovirus isolate CN/HB1713
MK518003	VP2		1	c (E)	Canine	China	2017		Canine parvovirus isolate CN/HB1715
MK518004	VP2		1	c (E)	Canine	China	2016		Canine parvovirus isolate CN/AH160
MK518005	VP2		1	c (E)	Canine	China	2016		Canine parvovirus isolate CN/AH1602
MK518006	VP2		1	c (E)	Canine	China	2016		Canine parvovirus isolate CN/AH1603
MK518007	VP2		1	b (D)	Canine	China	2016		Canine parvovirus isolate CN/AH1604
MK518008	VP2		1	c (E)	Canine	China	2017		Canine parvovirus isolate CN/AH1705
MK518010	VP2		1	c (E)	Canine	China	2017		Canine parvovirus isolate CN/AH1707
MK518011	VP2		1	b (D)	Canine	China	2017		Canine parvovirus isolate CN/AH1708
MK518012	VP2		1	c (E)	Canine	China	2017		Canine parvovirus isolate CN/AH1709
MK518013	VP2		1	a (N)	Canine	China	2017		Canine parvovirus isolate CN/AH1710
MK518014	VP2		1	c (E)	Canine	China	2016		Canine parvovirus isolate CN/JS160
MK518015	VP2		1	c (E)	Canine	China	2016		Canine parvovirus isolate CN/JS1602
MK518018	VP2		1	c (E)	Canine	China	2017		Canine parvovirus isolate CN/JS1705
MK518019	VP2		1	c (E)	Canine	China	2017		Canine parvovirus isolate CN/JS1706
MK518020	VP2		1	c (E)	Canine	China	2017		Canine parvovirus isolate CN/JS1707
MK518021	VP2		1	c (E)	Canine	China	2017		Canine parvovirus isolate CN/JS1708
MK806279	CG	1	1	c (E)	Dog	Italy	2018		Carnivore protoparvovirus strain IZSSI PA24478/18 id3184
MK806280	CG	1	1	c (E)	Dog	Italy	2018		Carnivore protoparvovirus strain IZSSI PA24478/18 id3230
MK806281	CG	1	1	c (E)	Dog	Italy	2018		Carnivore protoparvovirus strain IZSSI PA31342/18
MK806282	CG	1	1	c (E)	Dog	Italy	2018		Carnivore protoparvovirus strain IZSSI PA5455/19
MK806283	CG	1	1	c (E)	Dog	Italy	2018		Carnivore protoparvovirus strain IZSSI PA5446/19
MK806284	CG	1	1	c (E)	Dog	Italy	2019		Carnivore protoparvovirus strain IZSSI RG3408/19
MK806285	CG	1	1	c (E)	Dog	Italy	2019		Carnivore protoparvovirus strain IZSSI PA5632/19
MK895486	CG	1	1	c (E)	Dog	Nigeria	2018		Carnivore protoparvovirus strain IZSSI PA1464/19 idYV2
MK895487	CG	1	1	c (E)	Dog	Nigeria	2018		Carnivore protoparvovirus strain IZSSI PA1464/19 idEV8
MK895488	CG	1	1	c (E)	Dog	Nigeria	2018		Carnivore protoparvovirus strain IZSSI PA1464/19 idJOE2
MK895489	CG	1	1	c (E)	Dog	Nigeria	2018		Carnivore protoparvovirus strain IZSSI PA1464/19 idNC
MK895490	CG	1	1	c (E)	Dog	Nigeria	2018		Carnivore protoparvovirus strain IZSSI PA1464/19 idPSV2
MN119561	VP2		1	c (E)	Canine	China	2018		Canine parvovirus isolate CH AH D2
MN119562	VP2		1	c (E)	Canine	China	2018		Canine parvovirus isolate CH AH D3 capsid protein VP2 gene complete cds=1
MN119563	VP2		1	c (E)	Canine	China	2018		Canine parvovirus isolate CH AH D4 capsid protein VP2 gene complete cds=1
MT385095	NS1	1			Canine	China	2018		Canine parvovirus strain JL 18 1/Beagle nonstructural protein gene partial cds=630p
MN119565	VP2		1	c (E)	Canine	China	2018		Canine parvovirus isolate CH AH D6 capsid protein VP2 gene complete cds=1
MN119566	VP2		1	c (E)	Canine	China	2018		Canine parvovirus isolate CH AH D7 capsid protein VP2 gene complete cds=1
MN119567	VP2		1	c (E)	Canine	China	2018		Canine parvovirus isolate CH AH D8 capsid protein VP2 gene complete cds=1
MN119568	VP2		1	c (E)	Canine	China	2018		Canine parvovirus isolate CH AH D9 capsid protein VP2 gene complete cds=1
MN119569	VP2		1	c (E)	Canine	China	2018		Canine parvovirus isolate CH AH D10 capsid protein VP2 gene complete cds=1
MN119570	VP2		1	c (E)	Canine	China	2019		Canine parvovirus isolate CH AH D1capsid protein VP2 gene complete cds=1
MN119571	VP2		1	c (E)	Canine	China	2019		Canine parvovirus isolate CH AH D12 capsid protein VP2 gene complete cds=1
MN119572	VP2		1	c (E)	Canine	China	2019		Canine parvovirus isolate CH AH D13 capsid protein VP2 gene complete cds=1
MN119576	VP2		1	c (E)	Canine	China	2018		Canine parvovirus isolate CH HN Dcapsid protein VP2 gene complete cds=1
MN119577	VP2		1	c (E)	Canine	China	2018		Canine parvovirus isolate CH HN D2 capsid protein VP2 gene complete cds=1
MN119578	VP2		1	c (E)	Canine	China	2018		Canine parvovirus isolate CH HN D3 capsid protein VP2 gene complete cds=1
MN119579	VP2		1	c (E)	Canine	China	2018		Canine parvovirus isolate CH HN D4 capsid protein VP2 gene complete cds=1
MN119581	VP2		1	c (E)	Canine	China	2018		Canine parvovirus isolate CH HN D6 capsid protein VP2 gene complete cds=1
MN119583	VP2		1	c (E)	Canine	China	2018		Canine parvovirus isolate CH HN D8 capsid protein VP2 gene complete cds=1
MN119584	VP2		1	c (E)	Canine	China	2018		Canine parvovirus isolate CH HN D9 capsid protein VP2 gene complete cds=1
MN119585	VP2		1	c (E)	Canine	China	2018		Canine parvovirus isolate CH HN D10 capsid protein VP2 gene complete cds=1
MN119586	VP2		1	c (E)	Canine	China	2018		Canine parvovirus isolate CH HN D1capsid protein VP2 gene complete cds=1
MN119587	VP2		1	c (E)	Canine	China	2019		Canine parvovirus isolate CH HN D12 capsid protein VP2 gene complete cds=1
MN119588	VP2		1	c (E)	Canine	China	2019		Canine parvovirus isolate CH HN D13 capsid protein VP2 gene complete cds=1
MN119592	VP2		1	c (E)	Canine	China	2019		Canine parvovirus isolate CH HN D17 capsid protein VP2 gene complete cds=1
MN119594	VP2		1	c (E)	Canine	China	2019		Canine parvovirus isolate CH HN D19 capsid protein VP2 gene complete cds=1
MN119596	VP2		1	c (E)	Canine	China	2019		Canine parvovirus isolate CH HN D2capsid protein VP2 gene complete cds=1
MN119597	VP2		1	c (E)	Canine	China	2019		Canine parvovirus isolate CH HN D22 capsid protein VP2 gene complete cds=1
MN119598	VP2		1	c (E)	Canine	China	2019		Canine parvovirus isolate CH HN D23 capsid protein VP2 gene complete cds=1
MN119599	VP2		1	c (E)	Canine	China	2019		Canine parvovirus isolate CH HN D24 capsid protein VP2 gene complete cds=1
MN119600	VP2		1	c (E)	Canine	China	2019		Canine parvovirus isolate CH HN D25 capsid protein VP2 gene complete cds=1
MN119601	VP2		1	c (E)	Canine	China	2019		Canine parvovirus isolate CH HN D26 capsid protein VP2 gene complete cds=1
MN119602	VP2		1	c (E)	Canine	China	2019		Canine parvovirus isolate CH HN D27 capsid protein VP2 gene complete cds=1
MN119603	VP2		1	c (E)	Canine	China	2019		Canine parvovirus isolate CH HN D28 capsid protein VP2 gene complete cds=1
MN119604	VP2		1	c (E)	Canine	China	2019		Canine parvovirus isolate CH HN D29 capsid protein VP2 gene complete cds=1
MN119605	VP2		1	c (E)	Canine	China	2018		Canine parvovirus isolate CH ZJ Dcapsid protein VP2 gene complete cds=1
MN119606	VP2		1	c (E)	Canine	China	2018		Canine parvovirus isolate CH ZJ D2 capsid protein VP2 gene complete cds=1
MN119607	VP2		1	c (E)	Canine	China	2018		Canine parvovirus isolate CH ZJ D3 capsid protein VP2 gene complete cds=1
MN119608	VP2		1	c (E)	Canine	China	2018		Canine parvovirus isolate CH ZJ D4 capsid protein VP2 gene complete cds=1
MN119609	VP2		1	c (E)	Canine	China	2018		Canine parvovirus isolate CH ZJ D5 capsid protein VP2 gene complete cds=1
MN119610	VP2		1	c (E)	Canine	China	2018		Canine parvovirus isolate CH ZJ D6 capsid protein VP2 gene complete cds=1
MN119611	VP2		1	c (E)	Canine	China	2018		Canine parvovirus isolate CH ZJ D7 capsid protein VP2 gene complete cds=1
MN119612	VP2		1	c (E)	Canine	China	2018		Canine parvovirus isolate CH ZJ D8 capsid protein VP2 gene complete cds=1
MN119613	VP2		1	c (E)	Canine	China	2018		Canine parvovirus isolate CH ZJ D9 capsid protein VP2 gene complete cds=1
MN119614	VP2		1	c (E)	Canine	China	2018		Canine parvovirus isolate CH ZJ D10 capsid protein VP2 gene complete cds=1
MN119615	VP2		1	c (E)	Canine	China	2019		Canine parvovirus isolate CH ZJ D1capsid protein VP2 gene complete cds=1
MN119616	VP2		1	c (E)	Canine	China	2019		Canine parvovirus isolate CH ZJ D12 capsid protein VP2 gene complete cds=1
MN119617	VP2		1	c (E)	Canine	China	2019		Canine parvovirus isolate CH ZJ D13 capsid protein VP2 gene complete cds=1
MN119618	VP2		1	c (E)	Canine	China	2019		Canine parvovirus isolate CH ZJ D14 capsid protein VP2 gene complete cds=1
MN119619	VP2		1	c (E)	Canine	China	2019		Canine parvovirus isolate CH ZJ D15 capsid protein VP2 gene complete cds=1
MN119620	VP2		1	c (E)	Canine	China	2019		Canine parvovirus isolate CH ZJ D16 capsid protein VP2 gene complete cds=1
MN451678	CG	1	1	c (E)	Dog	Nigeria	2018		Canine parvovirus isolate CPV605 complete genome=1
MN451680	CG	1	1	c (E)	Dog	Nigeria	2018		Canine parvovirus isolate CPV607 complete genome=1
MN451681	CG	1	1	c (E)	Dog	Nigeria	2018		Canine parvovirus isolate CPV608 complete genome=1
MN451682	CG	1	1	c (E)	Dog	Nigeria	2018		Canine parvovirus isolate CPV609 complete genome=1
MN451687	CG	1	1	c (E)	Dog	Nigeria	2018		Canine parvovirus isolate CPV614 complete genome=1
MN453228	VP2		1	c (E)	Dog	South Korea	2019		Canine parvovirus 2 isolate Leo capsid protein gene partial cds=1
MN453230	VP2		1	c (E)	Dog	South Korea	2019		Canine parvovirus 2 isolate 19D179 capsid protein gene partial cds=1
MN519258	CG	1	1	c (E)	Dog	China	2019		Canine parvovirus strain CPV JL19 NS NS2 VP and VP2 genes complete cds=1
MN686018	VP2		1	c (E)	Dog	China	2019		Canine parvovirus VP2 gene partial cds=1
MN810876	VP2		1	c (E)	Canine	China	2019		Canine parvovirus isolate LY 8 VP2 gene complete cds=1
MN810878	VP2		1	c (E)	Canine	China	2019		Canine parvovirus isolate LY 6 VP2 gene complete cds=1
MN810879	VP2		1	c (E)	Canine	China	2019		Canine parvovirus isolate LY 5 VP2 gene complete cds=1
MN810881	VP2		1	c (E)	Canine	China	2018		Canine parvovirus isolate LY 3 VP2 gene complete cds=1
MN810883	VP2		1	c (E)	Canine	China	2017		Canine parvovirus isolate LY VP2 gene complete cds=1
MN810885	VP2		1	c (E)	Canine	China	2018		Canine parvovirus isolate CC 820 VP2 gene complete cds=1
MN810889	VP2		1	c (E)	Canine	China	2019		Canine parvovirus isolate CC 46 VP2 gene complete cds=1
MN810890	VP2		1	c (E)	Canine	China	2019		Canine parvovirus isolate CC 44 VP2 gene complete cds=1
MN810891	VP2		1	c (E)	Canine	China	2019		Canine parvovirus isolate CC 43 VP2 gene complete cds=1
MN810892	VP2		1	c (E)	Canine	China	2019		Canine parvovirus isolate CC 42 VP2 gene complete cds=1
MN810893	VP2		1	c (E)	Canine	China	2019		Canine parvovirus isolate CC 4VP2 gene complete cds=1
MN810894	VP2		1	c (E)	Canine	China	2019		Canine parvovirus isolate CC 39 VP2 gene complete cds=1
MN810896	VP2		1	c (E)	Canine	China	2019		Canine parvovirus isolate CC 37 VP2 gene complete cds=1
MN810897	VP2		1	c (E)	Canine	China	2018		Canine parvovirus isolate CC 36 VP2 gene complete cds=1
MN810898	VP2		1	c (E)	Canine	China	2018		Canine parvovirus isolate CC 35 VP2 gene complete cds=1
MN810899	VP2		1	c (E)	Canine	China	2018-2019		Canine parvovirus isolate CC 34 VP2 gene complete cds=1
MN810902	VP2		1	c (E)	Canine	China	2018-2019		Canine parvovirus isolate CC 3VP2 gene complete cds=1
MN810903	VP2		1	c (E)	Canine	China	2018-2019		Canine parvovirus isolate CC 30 VP2 gene complete cds=1
MN810904	VP2		1	c (E)	Canine	China	2018-2019		Canine parvovirus isolate CC 29 VP2 gene complete cds=1
MN810907	VP2		1	c (E)	Canine	China	2018-2019		Canine parvovirus isolate CC 25 VP2 gene complete cds=1
MN810908	VP2		1	c (E)	Canine	China	2018-2019		Canine parvovirus isolate CC 24 VP2 gene complete cds=1
MN810909	VP2		1	c (E)	Canine	China	2018-2019		Canine parvovirus isolate CC 22 VP2 gene complete cds=1
MN810910	VP2		1	c (E)	Canine	China	2018-2019		Canine parvovirus isolate CC 2VP2 gene complete cds=1
MN810911	VP2		1	c (E)	Canine	China	2018-2019		Canine parvovirus isolate CC 12 VP2 gene complete cds=1
MN810912	VP2		1	c (E)	Canine	China	2018-2019		Canine parvovirus isolate CC 1VP2 gene complete cds=1
MN810913	VP2		1	c (E)	Canine	China	2018-2019		Canine parvovirus isolate CC 10 VP2 gene complete cds=1
MN810914	VP2		1	c (E)	Canine	China	2018-2019		Canine parvovirus isolate CC 8 VP2 gene complete cds=1
MN810915	VP2		1	c (E)	Canine	China	2018-2019		Canine parvovirus isolate CC 7 VP2 gene complete cds=1
MN810916	VP2		1	c (E)	Canine	China	2018-2019		Canine parvovirus isolate CC 6 VP2 gene complete cds=1
MN810917	VP2		1	c (E)	Canine	China	2018-2019		Canine parvovirus isolate CC 5 VP2 gene complete cds=1
MN810918	VP2		1	c (E)	Canine	China	2018-2019		Canine parvovirus isolate CC 3 VP2 gene complete cds=1
MN832850	CG	1	1	c (E)	Pangolin	Taiwan	2019		Canine parvovirus 2c isolate Taiwan/2018 complete genome=1
MN840830	CG	0	1	c (E)	Canine	China	2019	Asian only in VP2	Canine parvovirus isolate Canine/SH/1/2019 complete genome=1
MT010564	CG	1	1	c (E)	Dog	China	2018		Canine parvovirus isolate CPV AHhf complete genome=1
MT106228	CG	1	1	c (E)	Dog	Viet Nam	2017		Canine parvovirus 2c strain HN07 partial genome=1
MT106229	CG	1	1	c (E)	Dog	Viet Nam	2017		Canine parvovirus 2c strain HN04 partial genome=1
MT106230	CG	1	1	c (E)	Dog	Viet Nam	2017		Canine parvovirus 2c strain HN08 partial genome=1
MT106231	CG	1	1	c (E)	Dog	Viet Nam	2017		Canine parvovirus 2c strain HN30 partial genome=1
MT106232	CG	1	1	c (E)	Dog	Viet Nam	2017		Canine parvovirus 2c strain HCM09 partial genome=1
MT106233	CG	1	1	c (E)	Dog	Viet Nam	2017		Canine parvovirus 2c strain DN0 partial genome=1
MT106234	CG	1	1	c (E)	Dog	Viet Nam	2017		Canine parvovirus 2c strain HCM0 partial genome=1
MT106235	CG	1	1	c (E)	Dog	Viet Nam	2017		Canine parvovirus 2c strain HN06 partial genome=1
MT106236	CG	1	1	c (E)	Dog	Viet Nam	2017		Canine parvovirus 2c strain DN02 partial genome=1
MT106237	CG	1	1	c (E)	Dog	Viet Nam	2017		Canine parvovirus 2c strain HCM03 partial genome=1
MT165693	CG	1	1	c (E)	Canine	China	2017		Canine parvovirus strain CPV 2c/China/SC 14/2017 nonstructural protein nonstructural protein 2 capsid protein and capsid protein 2 genes complete cds=1
MT179767	VP2		1	c (E)	Canine	China	2019		Canine parvovirus isolate CPVTS2 capsid protein VP2 VP2 gene complete cds=1
MT179768	VP2		1	c (E)	Canine	China	2019		Canine parvovirus isolate CPVTS4 capsid protein VP2 VP2 gene complete cds=1
MT179770	VP2		1	c (E)	Canine	China	2019		Canine parvovirus isolate CPVTS9 capsid protein VP2 VP2 gene complete cds=1
MT179771	VP2		1	c (E)	Canine	China	2019		Canine parvovirus isolate CPVTS10 capsid protein VP2 VP2 gene complete cds=1
MT179772	VP2		1	c (E)	Canine	China	2019		Canine parvovirus isolate CPVTS1capsid protein VP2 VP2 gene complete cds=1
MT179773	VP2		1	c (E)	Canine	China	2019		Canine parvovirus isolate CPVTS12 capsid protein VP2 VP2 gene complete cds=1
MT179774	VP2		1	c (E)	Canine	China	2019		Canine parvovirus isolate CPVTS13 capsid protein VP2 VP2 gene complete cds=1
MT179775	VP2		1	c (E)	Canine	China	2019		Canine parvovirus isolate CPVTS14 capsid protein VP2 VP2 gene complete cds=1
MT179776	VP2		1	c (E)	Canine	China	2019		Canine parvovirus isolate CPVTS19 capsid protein VP2 VP2 gene complete cds=1
MT179778	VP2		1	c (E)	Canine	China	2019		Canine parvovirus isolate CPVTS28 capsid protein VP2 VP2 gene complete cds=1
MT179779	VP2		1	c (E)	Canine	China	2019		Canine parvovirus isolate CPVTS29 capsid protein VP2 VP2 gene complete cds=1
MT179780	VP2		1	c (E)	Canine	China	2019		Canine parvovirus isolate CPVTS30 capsid protein VP2 VP2 gene complete cds=1
MT179782	VP2		1	c (E)	Canine	China	2019		Canine parvovirus isolate CPVTS33 capsid protein VP2 VP2 gene complete cds=1
MT179783	VP2		1	c (E)	Canine	China	2019		Canine parvovirus isolate CPVTS4capsid protein VP2 VP2 gene complete cds=1
MT179784	VP2		1	c (E)	Canine	China	2019		Canine parvovirus isolate CPVTS48 capsid protein VP2 VP2 gene complete cds=1
MT270587	VP2		1	c (E)	Cat	China	2019		Canine parvovirus isolate BJ482 capsid protein VP2 gene complete cds=1
MT270588	VP2		1	c (E)	Cat	China	2019		Canine parvovirus isolate BJ108 capsid protein VP2 gene complete cds=1
MT270589	VP2		1	c (E)	Cat	China	2019		Canine parvovirus isolate BJ107 capsid protein VP2 gene complete cds=1
MT270590	VP2		1	c (E)	Cat	China	2019		Canine parvovirus isolate BJ079 capsid protein VP2 gene complete cds=1
MT270591	VP2		1	c (E)	Canine	China	2019		Canine parvovirus isolate BJ010 capsid protein VP2 gene complete cds=1
MT270592	VP2		1	c (E)	Canine	China	2019		Canine parvovirus isolate BJ008 capsid protein VP2 gene complete cds=1
MT270593	VP2		1	c (E)	Canine	China	2019		Canine parvovirus isolate BJ007 capsid protein VP2 gene complete cds=1
MT270594	VP2		1	c (E)	Canine	China	2019		Canine parvovirus isolate BJ005 capsid protein VP2 gene complete cds=1
MT270595	VP2		1	c (E)	Canine	China	2019		Canine parvovirus isolate BJ003 capsid protein VP2 gene complete cds=1
MT270596	VP2		1	c (E)	Canine	China	2019		Canine parvovirus isolate BJ002 capsid protein VP2 gene complete cds=1
MT270597	VP2		1	c (E)	Canine	China	2019		Canine parvovirus isolate BJ00capsid protein VP2 gene complete cds=1
MT394165	CG	1	1	c (E)					Canine parvovirus isolate QD 202 complete genome=1
MT394166	CG	1	1	c (E)					Canine parvovirus isolate QD 20 complete genome=1
MT394167	CG	1	1	c (E)					Canine parvovirus isolate QD 20 complete genome=1
MT488452	VP2		1	c (E)	Dog	China	2019		Canine parvovirus isolate guangzhou/QG21/2019 VP2 gene complete cds=1
MT488453	VP2		1	c (E)	Dog	China	2019		Canine parvovirus isolate guangzhou/QG18/2019 VP2 gene complete cds=1
MT488454	VP2		1	c (E)	Dog	China	2018		Canine parvovirus isolate guangzhou/CWC/2018 VP2 gene complete cds=1
MT488455	VP2		1	c (E)	Dog	China	2019		Canine parvovirus isolate guangzhou/QG3/2019 VP2 gene complete cds=1
MT488458	VP2		1	c (E)	Dog	China	2018		Canine parvovirus isolate guangzhou/QH3/2018 VP2 gene complete cds=1
MT488459	VP2		1	c (E)	Dog	China	2018		Canine parvovirus isolate guangzhou/QH5/2018 VP2 gene complete cds=1
MT488460	VP2		1	c (E)	Dog	China	2018		Canine parvovirus isolate dongguan/XH1/2018 VP2 gene complete cds=1
MT488465	VP2		1	c (E)	Dog	China	2018		Canine parvovirus isolate guangzhou/DH6/2018 VP2 gene complete cds=1
MT488467	VP2		1	c (E)	Dog	China	2017		Canine parvovirus isolate guangzhou/DH1130 1/2017 VP2 gene complete cds=1
MT488468	VP2		1	c (E)	Dog	China	2017		Canine parvovirus isolate guangzhou/DH1130 2/2017 VP2 gene complete cds=1
MT525957	VP2		1	c (E)	Dog		2019		Canine parvovirus isolate S2 VP2 gene partial cds=1
MT525958	VP2		1	c (E)	Dog		2019		Canine parvovirus isolate TVP2 gene partial cds=1
MT525960	VP2		1	c (E)	Dog		2019		Canine parvovirus isolate YVP2 gene partial cds=1
MT525961	VP2		1	c (E)	Dog		2020		Canine parvovirus isolate Y2 VP2 gene partial cds=1
MT648202	CG	1	1	c (E)	Dog	China	2019		Canine parvovirus isolate CPV AHhf7 complete genome=1
MT648203	CG	1	1	c (E)	Dog	China	2019		Canine parvovirus isolate CPV AHhf27 complete genome=1
MT648204	CG	1	1	c (E)	Dog	China	2019		Canine parvovirus isolate CPV AHhf28 complete genome=1
MT648205	CG	1	1	c (E)	Dog	China	2018		Canine parvovirus isolate CPV mas2 complete genome=1
MT648207	CG	1	1	c (E)	Dog	China	2018		Canine parvovirus isolate CPV AHmas9 complete genome=1
MT648210	CG	1	1	c (E)	Dog	China	2019		Canine parvovirus isolate CPV AHcf4 complete genome=1
MT840287	CG	1	1	c (E)	Dog	Nigeria	2018		Carnivore protoparvovirus strain IZSSI PA1464/19 idJOE2 TR 4A72 partial genome=1
MT840288	CG	1	1	c (E)	Dog	Nigeria	2018		Carnivore protoparvovirus strain IZSSI PA1464/19 idNC TR 4A72 partial genome=1
MT840289	CG	1	1	c (E)	Dog	Nigeria	2018		Carnivore protoparvovirus strain IZSSI PA1464/19 idPSV2TR 4A72 partial genome=1
MT840290	CG	1	1	c (E)	Dog	Nigeria	2018		Carnivore protoparvovirus strain IZSSI PA1464/19 idEV8 TR 4A72 partial genome=1
MT840291	CG	1	1	c (E)	Dog	Nigeria	2018		Carnivore protoparvovirus strain IZSSI PA1464/19 idEV5 TR 4A72 partial genome=1
MT840292	CG	1	1	c (E)	Dog	Nigeria	2018		Carnivore protoparvovirus strain IZSSI PA1464/19 idNTR 4A72 partial genome=1
MT840293	CG	1	1	c (E)	Dog	Nigeria	2018		Carnivore protoparvovirus strain IZSSI PA1464/19 idV4 TR 4A72 partial genome=1
MT840294	CG	1	1	c (E)	Dog	Nigeria	2018		Carnivore protoparvovirus strain IZSSI PA1464/19 idYV7 TR 4A72 partial genome=1
MT892649	CG	1	1	c (E)	Dog	China	2019		Canine parvovirus isolate China XY complete genome=1
MT978635	VP2		0	c (E)	Dog	Myanmar	2018	440A	Canine parvovirus strain CPV-2c/Myanmar/RS-2/2018 capsid protein VP2 gene, partial cds
MT978636	VP2		1	c (E)	Dog	Myanmar	2018		Canine parvovirus strain CPV-2c/Myanmar/RS-4/2018 capsid protein VP2 gene, partial cds
MT978637	VP2		0	c (E)	Dog	Myanmar	2018	440A	Canine parvovirus strain CPV-2c/Myanmar/RS-6/2018 capsid protein VP2 gene, partial cds
MT978638	VP2		1	c (E)	Dog	Myanmar	2018		Canine parvovirus strain CPV-2c/Myanmar/RS-10/2018 capsid protein VP2 gene, partial cds
MT978639	VP2		0	c (E)	Dog	Myanmar	2018	440A	Canine parvovirus strain CPV-2c/Myanmar/RS-17/2018 capsid protein VP2 gene, partial cds
MT978640	VP2		1	c (E)	Dog	Myanmar	2018		Canine parvovirus strain CPV-2c/Myanmar/RS-18/2018 capsid protein VP2 gene, partial cds
MT978641	VP2		0	c (E)	Dog	Myanmar	2018	440A	Canine parvovirus strain CPV-2c/Myanmar/RS-21/2018 capsid protein VP2 gene, partial cds
MT978642	VP2		1	c (E)	Dog	Myanmar	2018		Canine parvovirus strain CPV-2c/Myanmar/RS-22/2018 capsid protein VP2 gene, partial cds
MT978644	VP2		0	c (E)	Dog	Myanmar	2018	440A	Canine parvovirus strain CPV-2c/Myanmar/RS-25/2018 capsid protein VP2 gene, partial cds
MT978645	VP2		0	c (E)	Dog	Myanmar	2018	440A	Canine parvovirus strain CPV-2c/Myanmar/RS-30/2018 capsid protein VP2 gene, partial cds
MT978646	VP2		0	c (E)	Dog	Myanmar	2018	440A	Canine parvovirus strain CPV-2c/Myanmar/RS-35/2018 capsid protein VP2 gene, partial cds
MT978647	VP2		1	c (E)	Dog	Myanmar	2019		Canine parvovirus strain CPV-2c/Myanmar/RS-45/2019 capsid protein VP2 gene, partial cds
MT978648	VP2		1	c (E)	Dog	Myanmar	2019		Canine parvovirus strain CPV-2c/Myanmar/RS-46/2019 capsid protein VP2 gene, partial cds
MT978649	VP2		1	c (E)	Dog	Myanmar	2019		Canine parvovirus strain CPV-2c/Myanmar/RS-70/2019 capsid protein VP2 gene, partial cds
MT981035	VP2		1	c (E)	Dog	Italy	2019		Carnivore protoparvovirus strain IZSSI PA11822/19 VP2 VP2 gene partial cds=1
MT981036	VP2		1	c (E)	Dog	Italy	2019		Carnivore protoparvovirus strain IZSSI PA26536/19 VP2 VP2 gene partial cds=1
MT996046	VP2		1	c (E)	Dog	Italy	2018		Canine parvovirus 2 strain 18DIAPD 54123/2 capsid protein VP2 gene complete cds=1
MW017573	VP2		1	c (E)	Canine	China	2018		Canine parvovirus isolate JSLYG 8 capsid protein VP2 gene complete cds=1
MW017574	VP2		1	c (E)	Canine	China	2018		Canine parvovirus isolate JSLYG 18 capsid protein VP2 gene complete cds=1
MW017575	VP2		1	c (E)	Canine	China	2018		Canine parvovirus isolate JSLYG-19 capsid protein VP2 gene, complete cds
MW017577	VP2		1	c (E)	Canine	China	2019		Canine parvovirus isolate JSYZ 29 capsid protein VP2 gene complete cds=1
MW017579	VP2		1	c (E)	Canine	China	2019		Canine parvovirus isolate JSYZ 67 capsid protein VP2 gene complete cds=1
MW017580	VP2		1	c (E)	Canine	China	2019		Canine parvovirus isolate JSYZ 68 capsid protein VP2 gene complete cds=1
MW017581	VP2		1	c (E)	Canine	China	2019		Canine parvovirus isolate JSYZ 69 capsid protein VP2 gene complete cds=1
MW017582	VP2		1	c (E)	Canine	China	2019		Canine parvovirus isolate JSYZ 70 capsid protein VP2 gene complete cds=1
MW017583	VP2		1	c (E)	Canine	China	2019		Canine parvovirus isolate JSYZ 7capsid protein VP2 gene complete cds=1
MW017584	VP2		1	c (E)	Canine	China	2019		Canine parvovirus isolate JSYZ 72 capsid protein VP2 gene complete cds=1
MW017585	VP2		1	c (E)	Canine	China	2019		Canine parvovirus isolate ZJHZ 73 capsid protein VP2 gene complete cds=1
MW017586	VP2		1	c (E)	Canine	China	2019		Canine parvovirus isolate ZJHZ 74 capsid protein VP2 gene complete cds=1
MW017587	VP2		1	c (E)	Canine	China	2019		Canine parvovirus isolate ZJHZ 75 capsid protein VP2 gene complete cds=1
MW017588	VP2		1	c (E)	Canine	China	2019		Canine parvovirus isolate ZJHZ 76 capsid protein VP2 gene complete cds=1
MW017589	VP2		1	c (E)	Canine	China	2019		Canine parvovirus isolate ZJHZ 77 capsid protein VP2 gene complete cds=1
MW017590	VP2		1	c (E)	Canine	China	2019		Canine parvovirus isolate SH 78 capsid protein VP2 gene complete cds=1
MW017591	VP2		1	c (E)	Canine	China	2019		Canine parvovirus isolate SH 79 capsid protein VP2 gene complete cds=1
MW017592	VP2		1	c (E)	Canine	China	2019		Canine parvovirus isolate SH 80 capsid protein VP2 gene complete cds=1
MW017593	VP2		1	c (E)	Canine	China	2019		Canine parvovirus isolate SH 8capsid protein VP2 gene complete cds=1
MW017594	VP2		1	c (E)	Canine	China	2019		Canine parvovirus isolate SH 82 capsid protein VP2 gene complete cds=1
MW017595	VP2		1	c (E)	Canine	China	2019		Canine parvovirus isolate JSYZ 84 capsid protein VP2 gene complete cds=1
MW017597	VP2		1	c (E)	Canine	China	2019		Canine parvovirus isolate JSYZ 86 capsid protein VP2 gene complete cds=1
MW017598	VP2		1	c (E)	Canine	China	2019		Canine parvovirus isolate JSYZ 87 capsid protein VP2 gene complete cds=1
MZ362881	CG	1	0	b (D)	Dog	Australia	2019	Asian only in NS1	Canine parvovirus 2b isolate Emerald/Queensland/4720/2019 complete genome=1
MW017599	VP2		1	c (E)	Canine	China	2019		Canine parvovirus isolate JSYZ 88 capsid protein VP2 gene complete cds=1
MW017601	VP2		1	c (E)	Canine	China	2019		Canine parvovirus isolate JSYZ-90 capsid protein VP2 gene, complete cds
MW017602	VP2		1	c (E)	Canine	China	2019		Canine parvovirus isolate JSYZ 9capsid protein VP2 gene complete cds=1
MW017603	VP2		1	c (E)	Canine	China	2019		Canine parvovirus isolate JSYZ 92 capsid protein VP2 gene complete cds=1
MW017606	VP2		1	c (E)	Canine	China	2019		Canine parvovirus isolate JSYZ 95 capsid protein VP2 gene complete cds=1
MW017607	VP2		1	c (E)	Canine	China	2020		Canine parvovirus isolate ZJHN 96 capsid protein VP2 gene complete cds=1
MW017608	VP2		1	c (E)	Canine	China	2020		Canine parvovirus isolate ZJHN 99 capsid protein VP2 gene complete cds=1
MW017609	VP2		1	c (E)	Canine	China	2020		Canine parvovirus isolate ZJHN 100 capsid protein VP2 gene complete cds=1
MW017610	VP2		1	c (E)	Canine	China	2020		Canine parvovirus isolate ZJHN 10capsid protein VP2 gene complete cds=1
MW017611	VP2		1	c (E)	Canine	China	2020		Canine parvovirus isolate ZJHN 11capsid protein VP2 gene complete cds=1
MW017612	VP2		1	c (E)	Canine	China	2020		Canine parvovirus isolate SH 113 capsid protein VP2 gene complete cds=1
MW017613	VP2		1	c (E)	Canine	China	2020		Canine parvovirus isolate SH 114 capsid protein VP2 gene complete cds=1
MW017614	VP2		1	c (E)	Canine	China	2020		Canine parvovirus isolate SH 116 capsid protein VP2 gene complete cds=1
MW017615	VP2		1	c (E)	Canine	China	2020		Canine parvovirus isolate ZJHN 134 capsid protein VP2 gene complete cds=1
MW017617	VP2		1	c (E)	Canine	China	2020		Canine parvovirus isolate ZJHN 136 capsid protein VP2 gene complete cds=1
MW017619	VP2		1	c (E)	Canine	China	2020		Canine parvovirus isolate ZJHN 140 capsid protein VP2 gene complete cds=1
MW017620	VP2		1	c (E)	Canine	China	2020		Canine parvovirus isolate JSNJ 145 capsid protein VP2 gene complete cds=1
MW017621	VP2		1	c (E)	Canine	China	2020		Canine parvovirus isolate JSYZ 148 capsid protein VP2 gene complete cds=1
MW017622	VP2		1	c (E)	Canine	China	2020		Canine parvovirus isolate JSYZ 149 capsid protein VP2 gene complete cds=1
MW017623	VP2		1	c (E)	Canine	China	2020		Canine parvovirus isolate JSYZ 150 capsid protein VP2 gene complete cds=1
MW017624	VP2		1	c (E)	Canine	China	2020		Canine parvovirus isolate JSYZ 15capsid protein VP2 gene complete cds=1
MW021549	VP2		1	c (E)	Canine	South Korea	2019		Canine parvovirus 2 isolate 19AU Pohang22 capsid protein VP2 gene partial cds=1
MW021550	VP2		1	c (E)	Canine	South Korea	2019		Canine parvovirus 2 isolate 19AU Pohang32 capsid protein VP2 gene partial cds=1
MW021551	VP2		1	c (E)	Canine	South Korea	2019		Canine parvovirus 2 isolate 19AU Pohang33 capsid protein VP2 gene partial cds=1
MW048581	VP2		1	c (E)	Canine	China	2020		Canine parvovirus isolate ZJHZ 97 capsid protein VP2 gene complete cds=1
MW182694	VP2		1	c (E)	Dog	China	2018		Canine parvovirus isolate 2018/3 VP2 gene partial cds=1
MW182697	VP2		1	c (E)	Dog	China	2018		Canine parvovirus isolate 2018/9 VP2 gene partial cds=1
MW182698	VP2		1	c (E)	Dog	China	2018		Canine parvovirus isolate 2018/10 VP2 gene partial cds=1
MW182700	VP2		1	c (E)	Dog	China	2018		Canine parvovirus isolate 2018/13 VP2 gene partial cds=1
MW182701	VP2		1	c (E)	Dog	China	2018		Canine parvovirus isolate 2018/19 VP2 gene partial cds=1
MW182703	VP2		1	c (E)	Dog	China	2018		Canine parvovirus isolate 2018/20 VP2 gene partial cds=1
MW182704	VP2		1	c (E)	Dog	China	2019		Canine parvovirus isolate 2019/VP2 gene partial cds=1
MW182705	VP2		1	c (E)	Dog	China	2019		Canine parvovirus isolate 2019/2 VP2 gene partial cds=1
MW182706	VP2		1	c (E)	Dog	China	2019		Canine parvovirus isolate 2019/5 VP2 gene partial cds=1
MW182709	VP2		1	c (E)	Dog	China	2019		Canine parvovirus isolate 2019/4 VP2 gene partial cds=1
MW182710	VP2		1	c (E)	Dog	China	2019		Canine parvovirus isolate 2019/7 VP2 gene partial cds=1
MW182711	VP2		1	c (E)	Dog	China	2018		Canine parvovirus isolate 2018/14 VP2 gene partial cds=1
MW182712	VP2		1	c (E)	Dog	China	2018		Canine parvovirus isolate 2018/22 VP2 gene partial cds=1
MW182713	VP2		1	c (E)	Dog	China	2018		Canine parvovirus isolate 2018/1VP2 gene partial cds=1
MW182714	VP2		1	c (E)	Dog	China	2018		Canine parvovirus isolate 2018/15 VP2 gene partial cds=1
MW182715	VP2		1	c (E)	Dog	China	2018		Canine parvovirus isolate 2018/17 VP2 gene partial cds=1
MW182717	VP2		1	c (E)	Dog	China	2019		Canine parvovirus isolate 2019/3 VP2 gene, partial cds
MW182719	VP2		1	c (E)	Dog	China	2020		Canine parvovirus isolate 2020/3 VP2 gene partial cds=1
MW182720	VP2		1	c (E)	Dog	China	2020		Canine parvovirus isolate 2020/5 VP2 gene partial cds=1
MW239577	VP2		1	c (E)	Dog	Viet Nam	2017		Carnivore protoparvovirus strain CPV1p HN VP2 gene complete cds=1
MW239578	VP2		1	c (E)	Dog	Viet Nam	2017		Carnivore protoparvovirus strain CPV4p HN VP2 gene complete cds=1
MW239579	VP2		1	c (E)	Dog	Viet Nam	2017		Carnivore protoparvovirus strain CPV6p HN VP2 gene complete cds=1
MW239580	VP2		1	c (E)	Dog	Viet Nam	2017		Carnivore protoparvovirus strain CPV7p HN VP2 gene complete cds=1
MZ836379	NS1	1			Dog	China	2020		Canine parvovirus 2c strain TZ CPV2c 13non structural protein gene complete cds=630p
MZ836380	NS1	1			Dog	China	2019		Canine parvovirus 2c strain TZ CPV2c 126 non structural protein gene complete cds=630p
MZ836381	NS1	1			Dog	China	2019		Canine parvovirus 2c strain JN CPV2c 9 non structural protein gene complete cds=630p
MZ836383	NS1	1			Dog	China	2019		Canine parvovirus 2c strain HD CPV2c 23 non structural protein gene complete cds=630p
MZ836384	NS1	1			Dog	China	2019		Canine parvovirus 2c strain XA CPV2c 0 14 non structural protein gene complete cds=630p
MZ836385	NS1	1			Dog	China	2019		Canine parvovirus 2c strain XA CPV2c 0 13 non structural protein gene complete cds=630p
MZ836386	NS1	1			Dog	China	2019		Canine parvovirus 2c strain XA CPV2c 0 12 non structural protein gene complete cds=630p
MZ836387	NS1	1			Dog	China	2019		Canine parvovirus 2c strain XA CPV2c 0 1non structural protein gene complete cds=630p
MZ836388	NS1	1			Dog	China	2019		Canine parvovirus 2c strain XA CPV2c 0 10 non structural protein gene complete cds=630p
MZ836390	NS1	1			Dog	China	2019		Canine parvovirus 2c strain XA CPV2c 0 7 non structural protein gene complete cds=630p
MZ836391	NS1	1			Dog	China	2019		Canine parvovirus 2c strain XA CPV2c 0 6 non structural protein gene complete cds=630p
MZ836392	NS1	1			Dog	China	2019		Canine parvovirus 2c strain XA CPV2c 0 3 non structural protein gene complete cds=630p
MZ836393	NS1	1			Dog	China	2019		Canine parvovirus 2c strain XA CPV2c 0 non structural protein gene complete cds=630p
MZ836396	NS1	1			Dog	China	2019		Canine parvovirus 2a strain TZ newCPV2a 142 non structural protein gene complete cds=630p
MZ836399	NS1	1			Dog	China	2019		Canine parvovirus 2 strain TZ CPV 158 non structural protein gene complete cds=630p
MZ836401	NS1	1			Dog	China	2019		Canine parvovirus 2c strain TZ CPV2c 173 non structural protein gene complete cds=630p
MZ836404	NS1	1			Dog	China	2020		Canine parvovirus 2c strain TZ CPV2c 164 non structural protein gene complete cds=630p
MZ836405	NS1	1			Dog	China	2020		Canine parvovirus 2c strain TZ CPV2c 152 non structural protein gene complete cds=630p
MZ836406	NS1	1			Dog	China	2020		Canine parvovirus 2c strain TZ CPV2c 14non structural protein gene complete cds=630p
MZ836407	NS1	1			Dog	China	2019		Canine parvovirus 2c strain TZ CPV2c 138 non structural protein gene complete cds=630p
MZ836408	NS1	1			Dog	China	2019		Canine parvovirus 2c strain XA CPV2c 0 16 non structural protein gene complete cds=630p
MZ836409	NS1	1			Dog	China	2019		Canine parvovirus 2c strain XA CPV2c 0 15 non structural protein gene complete cds=630p
MZ836410	NS1	1			Dog	China	2019		Canine parvovirus 2a strain XA newCPV2a 6 non structural protein gene complete cds=630p
MZ836418	NS1	1			Dog	China	2019		Canine parvovirus 2 strain XA CPV 7 non structural protein gene complete cds=630p
MZ836421	NS1	1			Dog	China	2019		Canine parvovirus 2c strain XA CPV2c 0 23 non structural protein gene complete cds=630p
MZ836422	NS1	1			Dog	China	2019		Canine parvovirus 2c strain XA CPV2c 0 22 non structural protein gene complete cds=630p
MZ836423	NS1	1			Dog	China	2019		Canine parvovirus 2c strain XA CPV2c 0 2non structural protein gene complete cds=630p
MZ836424	NS1	1			Dog	China	2019		Canine parvovirus 2c strain XA CPV2c 0 20 non structural protein gene complete cds=630p
MZ836425	NS1	1			Dog	China	2019		Canine parvovirus 2c strain XA CPV2c 0 19 non structural protein gene complete cds=630p
MZ836426	NS1	1			Dog	China	2019		Canine parvovirus 2c strain XA CPV2c 0 18 non structural protein gene complete cds=630p
MZ836427	NS1	1			Dog	China	2019		Canine parvovirus 2c strain XA CPV2c 0 17 non structural protein gene complete cds=630p
MZ836431	NS1	1			Cat	China	2020		Canine parvovirus 2c strain HD cat CPV2c 79 non structural protein gene complete cds=630p
MW239581	VP2		1	c (E)	Dog	Viet Nam	2017		Carnivore protoparvovirus strain CPV8p HN VP2 gene complete cds=1
MW239582	VP2		1	c (E)	Dog	Viet Nam	2018		Carnivore protoparvovirus strain CPV9p HN VP2 gene complete cds=1
MW239583	VP2		1	c (E)	Dog	Viet Nam	2018		Carnivore protoparvovirus strain CPV10p HN VP2 gene complete cds=1
MW239584	VP2		1	c (E)	Dog	Viet Nam	2019		Carnivore protoparvovirus strain CPV20 HN VP2 gene complete cds=1
MW239585	VP2		1	c (E)	Dog	Viet Nam	2019		Carnivore protoparvovirus strain CPV22 HN VP2 gene complete cds=1
MW239586	VP2		1	c (E)	Dog	Viet Nam	2017		Carnivore protoparvovirus strain CPV14 TN VP2 gene complete cds=1
MW239587	VP2		1	c (E)	Dog	Viet Nam	2017		Carnivore protoparvovirus strain CPV15p TN VP2 gene complete cds=1
MW239588	VP2		1	c (E)	Dog	Viet Nam	2017		Carnivore protoparvovirus strain CPV16n TN VP2 gene complete cds=1
MW239589	VP2		1	c (E)	Dog	Viet Nam	2017		Carnivore protoparvovirus strain CPV19 TN VP2 gene complete cds=1
MW239590	VP2		1	c (E)	Dog	Viet Nam	2017		Carnivore protoparvovirus strain CPV20 TN VP2 gene complete cds=1
MW239591	VP2		1	c (E)	Dog	Viet Nam	2017		Carnivore protoparvovirus strain CPV21n TN VP2 gene complete cds=1
MW239592	VP2		1	c (E)	Dog	Viet Nam	2019		Carnivore protoparvovirus strain CPV30 TN VP2 gene complete cds=1
MW239593	VP2		1	c (E)	Dog	Viet Nam	2017		Carnivore protoparvovirus strain CPV35 TN VP2 gene complete cds=1
MW239594	VP2		1	c (E)	Dog	Viet Nam	2018		Carnivore protoparvovirus strain CPV0BG VP2 gene complete cds=1
MW239595	VP2		1	c (E)	Dog	Viet Nam	2018		Carnivore protoparvovirus strain CPV02 BG VP2 gene complete cds=1
MW239596	VP2		1	c (E)	Dog	Viet Nam	2018		Carnivore protoparvovirus strain PCV24 BN VP2 gene complete cds=1
MW239597	VP2		1	c (E)	Dog	Viet Nam	2018		Carnivore protoparvovirus strain PCV25b BN VP2 gene complete cds=1
MW239598	VP2		1	c (E)	Dog	Viet Nam	2018		Carnivore protoparvovirus strain PCV26 BN VP2 gene complete cds=1
MW239599	VP2		1	c (E)	Dog	Viet Nam	2017		Carnivore protoparvovirus strain ParHN5l HY VP2 gene complete cds=1
MW239600	VP2		1	c (E)	Dog	Viet Nam	2017		Carnivore protoparvovirus strain ParHN1l HP VP2 gene complete cds=1
MW239601	VP2		1	c (E)	Dog	Viet Nam	2017		Carnivore protoparvovirus strain ParHN3l HP VP2 gene complete cds=1
MW239602	VP2		1	c (E)	Dog	Viet Nam	2018		Carnivore protoparvovirus strain PCV27 NA VP2 gene complete cds=1
MW239603	VP2		1	c (E)	Dog	Viet Nam	2018		Carnivore protoparvovirus strain PCV28 NA VP2 gene complete cds=1
MW239604	VP2		1	c (E)	Dog	Viet Nam	2019		Carnivore protoparvovirus strain Par25p NA VP2 gene complete cds=1
MW239605	VP2		1	c (E)	Dog	Viet Nam	2019		Carnivore protoparvovirus strain Par27p NA VP2 gene complete cds=1
MW239606	VP2		1	c (E)	Dog	Viet Nam	2018		Carnivore protoparvovirus strain PCV29 HT VP2 gene complete cds=1
MW239607	VP2		1	c (E)	Dog	Viet Nam	2018		Carnivore protoparvovirus strain PCV30 HT VP2 gene complete cds=1
MW239608	VP2		1	c (E)	Dog	Viet Nam	2019		Carnivore protoparvovirus strain CPCV3HT VP2 gene complete cds=1
MW239609	VP2		1	c (E)	Dog	Viet Nam	2019		Carnivore protoparvovirus strain PCV32 HT VP2 gene complete cds=1
MW495851	VP2		1	c (E)	Canine	China	2020		Canine parvovirus isolate CPV-JZ1 VP2 gene, complete cds
MW589466	CG	1	1	c (E)	Dog	Thailand	2020		Carnivore protoparvovirus strain TRC B63/TH/2020 NS NS2 VP and VP2 genes complete cds=1
MW589467	CG	1	1	c (E)	Dog	Thailand	2020		Carnivore protoparvovirus strain TRC B102/TH/2020 NS NS2 VP and VP2 genes complete cds=1
MW589468	CG	1	1	c (E)	Dog	Thailand	2020		Carnivore protoparvovirus strain TRC B90/TH/2020 NS NS2 VP and VP2 genes complete cds=1
MW589469	CG	0	1	c (E)	Dog	Thailand	2020	Asian only in VP2	Carnivore protoparvovirus strain TRC B112/TH/2020 NS NS2 VP and VP2 genes complete cds=1
MW589470	CG	0	1	c (E)	Dog	Thailand	2020	Asian only in VP2	Carnivore protoparvovirus strain TRC B111/TH/2020 NS NS2 VP and VP2 genes complete cds=1
MW650830	CG	1	1	c (E)	Dog	China	2020		Canine parvovirus isolate CPV SH200nonstructural protein NS nonstructural protein 2 NS2 capsid protein VP VP and capsid protein VP2 VP2 genes complete cds=1
MW659469	VP2		1	c (E)	Dog	Romania	2019		Carnivore protoparvovirus strain 157/2019 capsid protein VP2 VP2 gene complete cds=1
MW659470	VP2		1	c (E)	Dog	Romania	2019		Carnivore protoparvovirus strain 158/2019 capsid protein VP2 VP2 gene complete cds=1
MW659471	VP2		1	c (E)	Dog	Romania	2019		Carnivore protoparvovirus strain 159/2019 capsid protein VP2 VP2 gene complete cds=1
MW659472	VP2		1	c (E)	Dog	Romania	2019		Carnivore protoparvovirus strain 160/2019 capsid protein VP2 VP2 gene complete cds=1
MW659473	VP2		1	c (E)	Dog	Romania	2019		Carnivore protoparvovirus strain 161/2019 capsid protein VP2 VP2 gene complete cds=1
MW659474	VP2		1	c (E)	Dog	Romania	2019		Carnivore protoparvovirus strain 162/2019 capsid protein VP2 VP2 gene complete cds=1
MW659475	VP2		1	c (E)	Dog	Romania	2019		Carnivore protoparvovirus strain 163/2019 capsid protein VP2 VP2 gene complete cds=1
MW659476	VP2		1	c (E)	Dog	Romania	2019		Carnivore protoparvovirus strain 164/2019 capsid protein VP2 VP2 gene complete cds=1
MW659477	VP2		1	c (E)	Dog	Romania	2019		Carnivore protoparvovirus strain 165/2019 capsid protein VP2 VP2 gene complete cds=1
MW659478	VP2		1	c (E)	Dog	Romania	2019		Carnivore protoparvovirus strain 166/2019 capsid protein VP2 VP2 gene complete cds=1
MW691122	VP2		1	c (E)	Dog	China	2021		Canine parvovirus strain CPV2021/VP2 gene partial cds=1
MW691124	VP2		1	c (E)	Dog	China	2020		Canine parvovirus strain CPV2020/6 VP2 gene partial cds=1
MW715594	VP2		1	c (E)	Dog	China	2019		Canine parvovirus isolate HUNCHUN-4 VP2 gene, partial cds
ON035639	NS1	1			Cat	China	2021		Feline parvovirus isolate Yanjinonstructural protein gene complete cds=630p
MW715595	VP2		1	c (E)	Dog	China	2019		Canine parvovirus isolate HUNCHUN-5 VP2 gene, partial cds
MW715597	VP2		1	c (E)	Dog	China	2019		Canine parvovirus isolate LONGJING-4 VP2 gene, partial cds
MW715598	VP2		1	c (E)	Dog	China	2019		Canine parvovirus isolate TUMEN-3 VP2 gene, partial cds
MW728953	VP2		1	c (E)	Dog	China	2020		Canine parvovirus isolate CPV-BJ-004 capsid protein (VP2) gene, complete cds
MW728954	VP2		1	c (E)	Dog	China	2020		Canine parvovirus isolate CPV-BJ-006 capsid protein (VP2) gene, complete cds
MW728955	VP2		1	c (E)	Dog	China	2020		anine parvovirus isolate CPV-BJ-012 capsid protein (VP2) gene, complete cds
MW728956	VP2		1	c (E)	Dog	China	2020		Canine parvovirus isolate CPV-BJ-013 capsid protein (VP2) gene, complete cds
MW728957	VP2		1	c (E)	Dog	China	2020		Canine parvovirus isolate CPV-BJ-C01 capsid protein (VP2) gene, complete cds
MW728958	VP2		1	c (E)	Dog	China	2020		Canine parvovirus isolate CPV-BJ-C03 capsid protein (VP2) gene, complete cds
MW728959	VP2		1	c (E)	Dog	China	2020		Canine parvovirus isolate CPV-BJ-C04 capsid protein (VP2) gene, complete cds
MW728960	VP2		1	c (E)	Dog	China	2020		Canine parvovirus isolate CPV-BJ-C05 capsid protein (VP2) gene, complete cds
MW728961	VP2		1	c (E)	Dog	China	2020		Canine parvovirus isolate CPV-BJ-C06 capsid protein (VP2) gene, complete cds
MW728962	VP2		1	c (E)	Dog	China	2020		Canine parvovirus isolate CPV-BJ-C08 capsid protein (VP2) gene, complete cds
MW728964	VP2		1	c (E)	Dog	China	2020		Canine parvovirus isolate CPV-BJ-C10 capsid protein (VP2) gene, complete cds
MW728965	VP2		1	c (E)	Dog	China	2020		Canine parvovirus isolate CPV-BJ-C11 capsid protein (VP2) gene, complete cds
MW728966	VP2		1	c (E)	Dog	China	2020		Canine parvovirus isolate CPV-BJ-C12 capsid protein (VP2) gene, complete cds
MW728967	VP2		1	c (E)	Dog	China	2020		Canine parvovirus isolate CPV-BJ-C13 capsid protein (VP2) gene, complete cds
MW728968	VP2		1	c (E)	Dog	China	2020		Canine parvovirus isolate CPV-BJ-C14 capsid protein (VP2) gene, complete cds
MW728969	VP2		1	c (E)	Dog	China	2020		Canine parvovirus isolate CPV-BJ-C15 capsid protein (VP2) gene, complete cds
MW728970	VP2		1	c (E)	Dog	China	2020		Canine parvovirus isolate CPV-BJ-C18 capsid protein (VP2) gene, complete cds
MW728971	VP2		1	c (E)	Dog	China	2020		Canine parvovirus isolate CPV-BJ-C19 capsid protein (VP2) gene, complete cds
MW728972	VP2		1	c (E)	Dog	China	2020		Canine parvovirus isolate CPV-BJ-C20 capsid protein (VP2) gene, complete cds
MW728974	VP2		1	c (E)	Dog	China	2020		Canine parvovirus isolate CPV-BJ-C22 capsid protein (VP2) gene, complete cds
MW728975	VP2		1	c (E)	Dog	China	2020		Canine parvovirus isolate CPV-BJ-C23 capsid protein (VP2) gene, complete cds
MW728976	VP2		1	c (E)	Dog	China	2020		Canine parvovirus isolate CPV-BJ-C24 capsid protein (VP2) gene, complete cds
MW728977	VP2		1	c (E)	Dog	China	2020		Canine parvovirus isolate CPV-BJ-C25 capsid protein (VP2) gene, complete cds
MW728978	VP2		1	c (E)	Dog	China	2020		Canine parvovirus isolate CPV-BJ-C26 capsid protein (VP2) gene, complete cds
MW728979	VP2		1	c (E)	Dog	China	2020		Canine parvovirus isolate CPV-BJ-C29 capsid protein (VP2) gene, complete cds
MW728980	VP2		1	c (E)	Dog	China	2020		Canine parvovirus isolate CPV-BJ-C30 capsid protein (VP2) gene, complete cds
MW728982	VP2		1	c (E)	Dog	China	2020		Canine parvovirus isolate CPV-BJ-C33 capsid protein (VP2) gene, complete cds
MW811188	CG	1	1	c (E)	Dog	China	2020		Canine parvovirus 2c strain CPV SH2002 complete genome=1
MW811189	CG	1	1	c (E)	Dog	China	2020		Canine parvovirus 2c strain CPV SH2003 complete genome=1
MW815496	CG	1	1	c (E)	Dog	China	2020		Canine parvovirus strain CPV BJ C28 complete genome=1
MZ056884	VP2		1	c (E)	Dog	Egypt	2019		Canine parvovirus 2 isolate EGY-FVMVL-26/2019 VP2 protein gene, complete cds
MZ056885	VP2		1	c (E)	Dog	Egypt	2019		Canine parvovirus 2 isolate EGY-FVMVL-29/2019 VP2 protein gene, complete cds
MZ056886	VP2		1	c (E)	Dog	Egypt	2019		Canine parvovirus 2 isolate EGY-FVMVL-36/2019 VP2 protein gene, complete cds
MZ056889	VP2		1	c (E)	Dog	Egypt	2019		Canine parvovirus 2 isolate EGY-FVMVL-51/2019 VP2 protein gene, complete cds
MZ223471	VP2		0	c (E)	Dog	India	2021	440A	Canine parvovirus isolate CADRAD-IVRI 569CAD2c India/2021 surface structural protein (VP2) gene, complete cds
MZ391101	VP2		1	c (E)	Dog	Turkey	2020		Canine parvovirus isolate pato capsid protein (VP2) gene, partial cds
MZ506743	CG	1	1	c (E)	Dog	China	2019		Canine parvovirus isolate China XA nonstructural protein NS nonstructural protein 2 NS2 capsid protein VP and capsid protein 2 VP2 genes complete cds=1
MZ576575	VP2		1	c (E)	Dog	China	2019		Canine parvovirus isolate TS-A3 VP2 protein gene, partial cds
MZ576576	VP2		1	c (E)	Dog	China	2019		Canine parvovirus isolate TS-F7 VP2 protein gene, partial cds
MZ576577	VP2		1	c (E)	Dog	China	2019		Canine parvovirus isolate TS-F8 VP2 protein gene, partial cds
MZ576578	VP2		1	c (E)	Dog	China	2019		Canine parvovirus isolate TS-F11 VP2 protein gene, partial cds
MZ576580	VP2		1	c (E)	Dog	China	2019		Canine parvovirus isolate TS-K10 VP2 protein gene, partial cds
MZ576581	VP2		1	c (E)	Dog	China	2019		Canine parvovirus isolate TS-L6 VP2 protein gene, partial cds
MZ576582	VP2		1	c (E)	Dog	China	2019		Canine parvovirus isolate TS-M1 VP2 protein gene, partial cds
MZ614963	CG	1	1	c (E)	Dog	China	2019		Canine parvovirus isolate China XA 2 partial genome=1
MZ614964	CG	1	1	c (E)	Dog	China	2019		Canine parvovirus isolate China BJ partial genome=1
MZ614965	CG	1	1	c (E)	Dog	China	2019		Canine parvovirus isolate China BJ 2 partial genome=1
MZ614966	CG	0	1	c (E)	Dog	China	2019	Asian only in VP2	Canine parvovirus isolate China-AK, partial genome
MZ614967	CG	1	1	c (E)	Dog	China	2019		Canine parvovirus isolate China SL partial genome=1
MZ836301	VP2		1	c (E)	Dog	China	2019		Canine parvovirus 2c strain JN-CPV2c-9 main capsid protein gene, complete cds
MZ836302	VP2		1	c (E)	Dog	China	2019		Canine parvovirus 2c strain HD-CPV2c-23 main capsid protein gene, complete cds
MZ836311	VP2		1	c (E)	Dog	China	2019		Canine parvovirus 2c strain XA-CPV2c-8 main capsid protein gene, complete cds
MZ836312	VP2		1	c (E)	Dog	China	2019		Canine parvovirus 2c strain XA-CPV2c-5 main capsid protein gene, complete cds
MZ836313	VP2		1	c (E)	Dog	China	2019		Canine parvovirus 2c strain XA-CPV2c-4 main capsid protein gene, complete cds
MZ836314	VP2		1	c (E)	Dog	China	2019		Canine parvovirus 2c strain XA-CPV2c-0-23 main capsid protein gene, complete cds
MZ836315	VP2		1	c (E)	Dog	China	2019		Canine parvovirus 2c strain XA-CPV2c-0-22 main capsid protein gene, complete cds
MZ836316	VP2		1	c (E)	Dog	China	2019		Canine parvovirus 2c strain XA-CPV2c-0-21 main capsid protein gene, complete cds
MZ836317	VP2		1	c (E)	Dog	China	2019		Canine parvovirus 2c strain XA-CPV2c-0-20 main capsid protein gene, complete cds
MZ836318	VP2		1	c (E)	Dog	China	2019		Canine parvovirus 2c strain XA-CPV2c-0-19 main capsid protein gene, complete cds
MZ836319	VP2		1	c (E)	Dog	China	2019		Canine parvovirus 2c strain XA-CPV2c-0-18 main capsid protein gene, complete cds
MZ836320	VP2		1	c (E)	Dog	China	2019		Canine parvovirus 2c strain XA-CPV2c-0-17 main capsid protein gene, complete cds
MZ836321	VP2		1	c (E)	Dog	China	2019		Canine parvovirus 2c strain XA-CPV2c-0-15 main capsid protein gene, complete cds
MZ836322	VP2		1	c (E)	Dog	China	2019		Canine parvovirus 2c strain XA-CPV2c-0-14 main capsid protein gene, complete cds
MZ836323	VP2		1	c (E)	Dog	China	2019		Canine parvovirus 2c strain XA-CPV2c-0-13 main capsid protein gene, complete cds
MZ836324	VP2		1	c (E)	Dog	China	2019		Canine parvovirus 2c strain XA-CPV2c-0-12 main capsid protein gene, complete cds
MZ836325	VP2		1	c (E)	Dog	China	2019		Canine parvovirus 2c strain XA-CPV2c-0-11 main capsid protein gene, complete cds
MZ836326	VP2		1	c (E)	Dog	China	2019		Canine parvovirus 2c strain XA-CPV2c-0-10 main capsid protein gene, complete cds
MZ836328	VP2		1	c (E)	Dog	China	2019		Canine parvovirus 2c strain XA-CPV2c-0-7 main capsid protein gene, complete cds
MZ836329	VP2		1	c (E)	Dog	China	2019		Canine parvovirus 2c strain XA-CPV2c-0-6 main capsid protein gene, complete cds
MZ836330	VP2		1	c (E)	Dog	China	2019		Canine parvovirus 2c strain XA-CPV2c-0-3 main capsid protein gene, complete cds
MZ836331	VP2		1	c (E)	Dog	China	2019		Canine parvovirus 2c strain XA-CPV2c-0-1 main capsid protein gene, complete cds
MZ836337	VP2		1	c (E)	Dog	China	2019		Canine parvovirus 2c strain TZ-CPV2c-174 main capsid protein gene, complete cds
MZ836338	VP2		1	c (E)	Dog	China	2019		Canine parvovirus 2c strain TZ-CPV2c-173 main capsid protein gene, complete cds
MZ836339	VP2		1	c (E)	Dog	China	2019		Canine parvovirus 2c strain TZ-CPV2c-171 main capsid protein gene, complete cds
MZ836340	VP2		1	c (E)	Dog	China	2020		Canine parvovirus 2c strain TZ-CPV2c-165 main capsid protein gene, complete cds
MZ836341	VP2		1	c (E)	Dog	China	2020		Canine parvovirus 2c strain TZ-CPV2c-164 main capsid protein gene, complete cds
MZ836342	VP2		1	c (E)	Dog	China	2020		Canine parvovirus 2c strain TZ-CPV2c-152 main capsid protein gene, complete cds
MZ836343	VP2		1	c (E)	Dog	China	2020		Canine parvovirus 2c strain TZ-CPV2c-141 main capsid protein gene, complete cds
MZ836344	VP2		1	c (E)	Dog	China	2019		Canine parvovirus 2c strain TZ-CPV2c-138 main capsid protein gene, complete cds
MZ836345	VP2		1	c (E)	Dog	China	2020		Canine parvovirus 2c strain TZ-CPV2c-131 main capsid protein gene, complete cds
MZ836346	VP2		1	c (E)	Dog	China	2019		Canine parvovirus 2c strain TZ-CPV2c-126 main capsid protein gene, complete cds
MZ836349	VP2		1	c (E)	Cat	China	2020		Canine parvovirus 2c strain HD-cat-CPV2c-79 main capsid protein gene, complete cds
MZ836372	VP2		1	c (E)	Cat	China	2020		Canine parvovirus 2c strain TZ-cat-CPV2c-121 main capsid protein gene, complete cds
MZ857182	VP2		1	c (E)	Canine	China	2021		Canine parvovirus 2c isolate CDD06 structural protein (VP2) gene, complete cds
MZ857183	VP2		1	c (E)	Canine	China	2021		Canine parvovirus 2c isolate CDD09 structural protein (VP2) gene, complete cds
MZ857184	VP2		1	c (E)	Canine	China	2021		Canine parvovirus 2c isolate CDD10 structural protein (VP2) gene, complete cds
MZ857186	VP2		1	c (E)	Canine	China	2021		Canine parvovirus 2c isolate CDD16 structural protein (VP2) gene, complete cds
OK094438	CG	1	1	c (E)	Dog	Viet Nam	2018		Canine parvovirus isolate VNUA/CPV152 Hanoi nonstructural protein NS NS nonstructural protein NS2 NS2 structural protein VP VP and structural protein VP2 VP2 genes complete cds=1
OK094439	CG	1	1	c (E)	Dog	Viet Nam	2018		Canine parvovirus isolate VNUA/CPV153 VP nonstructural protein NS NS nonstructural protein NS2 NS2 structural protein VP VP and structural protein VP2 VP2 genes complete cds=1
OK094440	CG	1	1	c (E)	Dog	Viet Nam	2019		Canine parvovirus isolate VNUA/CPV175 BG nonstructural protein NS NS nonstructural protein NS2 NS2 structural protein VP VP and structural protein VP2 VP2 genes complete cds=1
OK094441	CG	1	1	c (E)	Dog	Viet Nam	2019		Canine parvovirus isolate VNUA/CPV376 BN nonstructural protein NS NS nonstructural protein NS2 NS2 structural protein VP VP and structural protein VP2 VP2 genes complete cds=1
OK094442	CG	1	1	c (E)	Dog	Viet Nam	2020		Canine parvovirus isolate VNUA/CPV379 VP nonstructural protein NS NS nonstructural protein NS2 NS2 structural protein VP VP and structural protein VP2 VP2 genes complete cds=1
OK094443	CG	1	1	c (E)	Dog	Viet Nam	2020		Canine parvovirus isolate VNUA/CPV380 Hanoi nonstructural protein NS NS nonstructural protein NS2 NS2 structural protein VP VP and structural protein VP2 VP2 genes complete cds=1
OK094444	CG	1	1	c (E)	Dog	Viet Nam	2020		Canine parvovirus isolate VNUA/CPV384 BN nonstructural protein NS NS nonstructural protein NS2 NS2 structural protein VP VP and structural protein VP2 VP2 genes complete cds=1
OK094445	CG	1	1	c (E)	Dog	Viet Nam	2020		Canine parvovirus isolate VNUA/CPV385 HNa nonstructural protein NS NS nonstructural protein NS2 NS2 structural protein VP VP and structural protein VP2 VP2 genes complete cds=1
OK346430	VP2		1	c (E)	Dog	India	2020		Canine parvovirus 2 isolate CPV/MZ/IND/1 capsid protein (VP2) gene, complete cds
OK346431	VP2		1	c (E)	Dog	India	2020		Canine parvovirus 2 isolate CPV/MZ/IND/2 capsid protein (VP2) gene, complete cds
OK346432	VP2		1	c (E)	Dog	India	2020		Canine parvovirus 2 isolate CPV/MZ/IND/3 capsid protein (VP2) gene, complete cds
OK346433	VP2		1	c (E)	Dog	India	2021		Canine parvovirus 2 isolate CPV/MN/IND/5 capsid protein (VP2) gene, complete cds
OK346434	VP2		1	c (E)	Dog	India	2021		Canine parvovirus 2 isolate CPV/MN/IND/6 capsid protein (VP2) gene, complete cds
OK384308	VP2		1	c (E)	Canine	China	2019		Canine parvovirus 2 isolate CPV-SD/2019/4 capsid protein VP2 gene, complete cds
OK571392	VP2		1	c (E)	Dog	China	2020		Canine parvovirus isolate CPV-SH2004 structural protein 2 (VP2) gene, complete cds
OK571393	VP2		1	c (E)	Dog	China	2020		Canine parvovirus isolate CPV-SH2005 structural protein 2 (VP2) gene, complete cds
OK571394	VP2		1	c (E)	Dog	China	2020		Canine parvovirus isolate CPV-SH2006 structural protein 2 (VP2) gene, complete cds
OK649756	VP2		1	c (E)	Dog	China	2020		Canine parvovirus isolate CPV-SH2007 capsid protein VP2 (VP2) gene, complete cds
OK649757	VP2		1	c (E)	Dog	China	2020		Canine parvovirus isolate CPV-SH2008 capsid protein VP2 (VP2) gene, complete cds
OK649758	VP2		1	c (E)	Dog	China	2020		Canine parvovirus isolate CPV-SH2009 capsid protein VP2 (VP2) gene, complete cds
OK649759	VP2		1	c (E)	Dog	China	2020		Canine parvovirus isolate CPV-SH2010 capsid protein VP2 (VP2) gene, complete cds
OK649760	VP2		1	c (E)	Dog	China	2020		Canine parvovirus isolate CPV-SH2011 capsid protein VP2 (VP2) gene, complete cds
OK649761	VP2		1	c (E)	Dog	China	2020		Canine parvovirus isolate CPV-SH2012 capsid protein VP2 (VP2) gene, complete cds
OL546612	VP2		0	c (E)	Dog	Iraq	2017	267F	Canine parvovirus isolate CPV-2c/Sul6/2017 VP2 (VP2) gene, partial cds
OL546613	VP2		0	c (E)	Dog	Iraq	2017	267F	Canine parvovirus isolate CPV-2c/Sul7/2017 VP2 (VP2) gene, partial cds
OM057673	VP2		1	c (E)	Canine	China	2021		Canine parvovirus isolate YBHC-2021-01 VP2 protein gene, complete cds
OM057674	VP2		1	c (E)	Canine	China	2021		Canine parvovirus isolate YBDH-2021-01 VP2 protein gene, complete cds
OM057679	VP2		1	c (E)	Canine	China	2021		Canine parvovirus isolate YBTM-2021-01 VP2 protein gene, complete cds
OM100696	VP2		1	c (E)	Dog	Egypt	2021		Canine parvovirus 2 isolate EGY-FVMVL-17/2019 VP2 protein gene, complete cds
OM100697	VP2		1	c (E)	Dog	Egypt	2021		Canine parvovirus 2 isolate EGY-FVMVL-18/2019 VP2 protein gene, complete cds
OM100698	VP2		1	c (E)	Dog	Egypt	2021		Canine parvovirus 2 isolate EGY-FVMVL-21/2019 VP2 protein gene, complete cds
OM100699	VP2		1	c (E)	Dog	Egypt	2021		Canine parvovirus 2 isolate EGY-FVMVL-26/2019 VP2 protein gene, complete cds
OM100701	VP2		1	c (E)	Dog	Egypt	2020		Canine parvovirus 2 isolate EGY-FVMVL-36/2019 VP2 protein gene, complete cds
OM322821	VP2		1	c (E)	Cat	China	2021		Feline parvovirus isolate Yanji2 VP2 gene, complete cds
OM451214	VP2		1	c (E)	Pangolin	China	2019		Carnivore protoparvovirus 1 isolate ZJ-MO4 nonstructural protein 1 and VP1 genes, complete cds
OM523069	CG		1	c (E)	Canine	China	2021	Asian only in VP2	Canine parvovirus strain W56, partial genome
OM523070	CG	1	1	c (E)	Canine	China	2021		Canine parvovirus strain W33 partial genome=1
OM523071	CG	1	1	c (E)	Canine	China	2021		Canine parvovirus strain W2 partial genome=1
OM523072	CG	1	1	c (E)	Canine	China	2021		Canine parvovirus strain W17 partial genome=1
OM523073	CG	1	1	c (E)	Canine	China	2021		Canine parvovirus strain W07 partial genome=1
OM523074	CG	1	1	c (E)	Canine	China	2021		Canine parvovirus strain W66 partial genome=1
OM523075	CG	1	1	c (E)	Canine	China	2021		Canine parvovirus strain W65 partial genome=1
OM523076	CG	1	1	c (E)	Canine	China	2021		Canine parvovirus strain W54 partial genome=1
OM523077	CG	1	1	c (E)	Canine	China	2021		Canine parvovirus strain W25 partial genome=1
OM640098	CG	1	1	c (E)	Dog	Canada	2018		Canine parvovirus 2 strain FM4 complete genome=1
OM892823	VP2		1	c (E)	Dog	Italy	2019		Carnivore protoparvovirus 1 strain CPV-636/2019 VP2 (VP2) gene, complete cds
OM892824	VP2		1	c (E)	Dog	Italy	2019		Carnivore protoparvovirus 1 strain CPV-637/2019 VP2 (VP2) gene, complete cds
OM918770	VP2		1	c (E)	Cat	China	2021		Feline parvovirus isolate Yanji23 VP2 gene, complete cds
OM918781	VP2		1	c (E)	Cat	China	2021		Feline parvovirus isolate Yanji36 VP2 gene, complete cds
OM937842	VP2		1	c (E)	Dog	Ehiopia	2021		Carnivore protoparvovirus 1 isolate 16d capsid protein VP2 gene, partial cds
OM937843	VP2		1	c (E)	Dog	Ehiopia	2021		Carnivore protoparvovirus 1 isolate 17d capsid protein VP2 gene, partial cds
OM937845	VP2		1	c (E)	Dog	Ehiopia	2021		Carnivore protoparvovirus 1 isolate 18b capsid protein VP2 gene, partial cds
OM937846	VP2		1	c (E)	Dog	Ehiopia	2021		Carnivore protoparvovirus 1 isolate 18c capsid protein VP2 gene, partial cds
OM937908	VP2		1	c (E)	Dog	Egypt	2019		Canine parvovirus strain EGY/2019/39-134 capsid protein VP2 gene, complete cds
OM937909	VP2		1	c (E)	Dog	Egypt	2019		Canine parvovirus strain EGY/2019/39-161 capsid protein VP2 gene, complete cds
OM937910	VP2		1	c (E)	Dog	Egypt	2019		Canine parvovirus strain EGY/2019/39-167 capsid protein VP2 gene, complete cds
OM937911	VP2		1	c (E)	Dog	Egypt	2019		Canine parvovirus strain EGY/2019/39-168 capsid protein VP2 gene, complete cds
OM937912	VP2		1	c (E)	Dog	Egypt	2019		Canine parvovirus strain EGY/2019/39-178 capsid protein VP2 gene, complete cds
ON322751	CG	1	1	c (E)	Dog	China	2020		Canine parvovirus 2 strain HN 002 partial genome=1
ON322753	CG	1	1	c (E)	Dog	China	2020		Canine parvovirus 2 strain HN 004 partial genome=1
ON322754	CG	1	1	c (E)	Dog	China	2020		Canine parvovirus 2 strain HN 005 partial genome=1
ON322755	CG	1	1	c (E)	Dog	China	2020		Canine parvovirus 2 strain HN 006 partial genome=1
ON322756	CG	1	1	c (E)	Dog	China	2020		Canine parvovirus 2 strain HN 007 partial genome=1
ON322757	CG	1	1	c (E)	Dog	China	2020		Canine parvovirus 2 strain HN 008 partial genome=1
ON322758	CG	1	1	c (E)	Dog	China	2020		Canine parvovirus 2 strain HN 009 partial genome=1
ON322759	CG	1	1	c (E)	Dog	China	2020		Canine parvovirus 2 strain HN 010 partial genome=1
ON322760	CG	1	1	c (E)	Dog	China	2020		Canine parvovirus 2 strain HN 01 partial genome=1
ON322761	CG	1	1	c (E)	Dog	China	2020		Canine parvovirus 2 strain HN 012 partial genome=1
ON322766	CG	1	1	c (E)	Dog	China	2020		Canine parvovirus 2 strain HN 017 partial genome=1
ON322767	CG	1	1	c (E)	Dog	China	2020		Canine parvovirus 2 strain HN 018 partial genome=1
ON322768	CG	0	1	c (E)	Dog	China	2020	Asian only in VP2	Canine parvovirus 2 strain HN-019, partial genome
ON322769	CG	1	1	c (E)	Dog	China	2020		Canine parvovirus 2 strain HN 02 partial genome=1
ON322770	CG	1	1	c (E)	Dog	China	2020		Canine parvovirus 2 strain HN 022 partial genome=1
ON322771	CG	1	1	c (E)	Dog	China	2020		Canine parvovirus 2 strain HN 023 partial genome=1
ON322772	CG	1	1	c (E)	Dog	China	2020		Canine parvovirus 2 strain HN 024 partial genome=1
ON322773	CG	1	1	c (E)	Dog	China	2020		Canine parvovirus 2 strain HN 025 partial genome=1
ON322774	CG	1	1	c (E)	Dog	China	2020		Canine parvovirus 2 strain HN 026 partial genome=1
ON322776	CG	1	1	c (E)	Dog	China	2020		Canine parvovirus 2 strain HN 028 partial genome=1
ON322777	CG	1	1	c (E)	Dog	China	2020		Canine parvovirus 2 strain HN 029 partial genome=1
ON322778	CG	1	1	c (E)	Dog	China	2020		Canine parvovirus 2 strain HN 030 partial genome=1
ON322779	CG	1	1	c (E)	Dog	China	2020		Canine parvovirus 2 strain HN 03 partial genome=1
ON322780	CG	1	1	c (E)	Dog	China	2020		Canine parvovirus 2 strain HN 033 partial genome=1
ON322781	CG	1	1	c (E)	Dog	China	2020		Canine parvovirus 2 strain HN 034 partial genome=1
ON322782	CG	1	1	c (E)	Dog	China	2020		Canine parvovirus 2 strain HN 035 partial genome=1
ON322784	CG	0	1	c (E)	Dog	China	2020	Asian only in VP2	Canine parvovirus 2 strain HN-038, partial genome
ON322785	CG	1	1	c (E)	Dog	China	2020		Canine parvovirus 2 strain HN 039 partial genome=1
ON322786	CG	1	1	c (E)	Dog	China	2020		Canine parvovirus 2 strain HN 040 partial genome=1
ON322787	CG	1	1	c (E)	Dog	China	2020		Canine parvovirus 2 strain HN 04 partial genome=1
ON322788	CG	1	1	c (E)	Dog	China	2020		Canine parvovirus 2 strain HN 042 partial genome=1
ON322789	CG	1	1	c (E)	Dog	China	2020		Canine parvovirus 2 strain HN 043 partial genome=1
ON322790	CG	1	1	c (E)	Dog	China	2020		Canine parvovirus 2 strain HN 044 partial genome=1
ON322791	CG	1	1	c (E)	Dog	China	2020		Canine parvovirus 2 strain HN 045 partial genome=1
ON322792	CG	1	1	c (E)	Dog	China	2020		Canine parvovirus 2 strain HN 046 partial genome=1
ON322793	CG	1	1	c (E)	Dog	China	2020		Canine parvovirus 2 strain HN 047 partial genome=1
ON322794	CG	1	1	c (E)	Dog	China	2020		Canine parvovirus 2 strain HN 048 partial genome=1
ON322795	CG	1	1	c (E)	Dog	China	2020		Canine parvovirus 2 strain HN 049 partial genome=1
ON322796	CG	1	1	c (E)	Dog	China	2020		Canine parvovirus 2 strain HN 050 partial genome=1
ON322797	CG	1	1	c (E)	Dog	China	2020		Canine parvovirus 2 strain HN 05 partial genome=1
ON322798	CG	1	1	c (E)	Dog	China	2020		Canine parvovirus 2 strain HN 055 partial genome=1
ON322799	CG	0	1	c (E)	Dog	China	2020	Asian only in VP2	Canine parvovirus 2 strain HN-056, partial genome
ON322800	CG	0	1	c (E)	Dog	China	2020	Asian only in VP2	Canine parvovirus 2 strain HN-057, partial genome
ON322801	CG	0	1	c (E)	Dog	China	2020	Asian only in VP2	Canine parvovirus 2 strain HN-058, partial genome
ON322802	CG	1	1	c (E)	Dog	China	2020		Canine parvovirus 2 strain HN 059 partial genome=1
ON322803	CG	1	1	c (E)	Dog	China	2020		Canine parvovirus 2 strain HN 060 partial genome=1
ON322804	CG	1	1	c (E)	Dog	China	2020		Canine parvovirus 2 strain HN 06 partial genome=1
ON322805	CG	1	1	c (E)	Dog	China	2020		Canine parvovirus 2 strain HN 062 partial genome=1
ON322806	CG	1	1	c (E)	Dog	China	2020		Canine parvovirus 2 strain HN 063 partial genome=1
ON322807	CG	1	1	c (E)	Dog	China	2020		Canine parvovirus 2 strain HN 064 partial genome=1
ON322808	CG	1	1	c (E)	Dog	China	2020		Canine parvovirus 2 strain HN 065 partial genome=1
ON322809	CG	1	1	c (E)	Dog	China	2020		Canine parvovirus 2 strain HN 066 partial genome=1
ON322810	CG	1	1	c (E)	Dog	China	2020		Canine parvovirus 2 strain HN 068 partial genome=1
ON322811	CG	1	1	c (E)	Dog	China	2020		Canine parvovirus 2 strain HN 069 partial genome=1
ON322812	CG	1	1	c (E)	Dog	China	2020		Canine parvovirus 2 strain HN 070 partial genome=1
ON322813	CG	1	1	c (E)	Dog	China	2020		Canine parvovirus 2 strain HN 07 partial genome=1
ON322814	CG	1	1	c (E)	Dog	China	2020		Canine parvovirus 2 strain HN 072 partial genome=1
ON322815	CG	1	1	c (E)	Dog	China	2020		Canine parvovirus 2 strain HN 073 partial genome=1
ON322816	CG	1	1	c (E)	Dog	China	2020		Canine parvovirus 2 strain HN 074 partial genome=1
ON322817	CG	1	1	c (E)	Dog	China	2020		Canine parvovirus 2 strain HN 075 partial genome=1
ON322818	CG	1	1	c (E)	Dog	China	2020		Canine parvovirus 2 strain HN 076 partial genome=1
ON322819	CG	1	1	c (E)	Dog	China	2020		Canine parvovirus 2 strain HN 077 partial genome=1
ON322820	CG	1	1	c (E)	Dog	China	2020		Canine parvovirus 2 strain HN 078 partial genome=1
ON322821	CG	1	1	c (E)	Dog	China	2020		Canine parvovirus 2 strain HN 079 partial genome=1
ON322822	CG	1	1	c (E)	Dog	China	2020		Canine parvovirus 2 strain HN 080 partial genome=1
ON322823	CG	1	1	c (E)	Dog	China	2020		Canine parvovirus 2 strain HN 08 partial genome=1
ON322824	CG	1	1	c (E)	Dog	China	2020		Canine parvovirus 2 strain HN 082 partial genome=1
ON322825	CG	1	1	c (E)	Dog	China	2020		Canine parvovirus 2 strain HN 084 partial genome=1
ON322826	CG	1	1	c (E)	Dog	China	2020		Canine parvovirus 2 strain HN 085 partial genome=1
ON322827	CG	0	1	c (E)	Dog	China	2020	Asian only in VP2	Canine parvovirus 2 strain HN-086, partial genome
ON322828	CG	1	1	c (E)	Dog	China	2020		Canine parvovirus 2 strain HN 087 partial genome=1
ON322829	CG	1	1	c (E)	Dog	China	2020		Canine parvovirus 2 strain HN 088 partial genome=1
ON322831	CG	1	1	c (E)	Dog	China	2020		Canine parvovirus 2 strain HN 090 partial genome=1
ON322832	CG	1	1	c (E)	Dog	China	2020		Canine parvovirus 2 strain HN 09 partial genome=1
ON322833	CG	1	1	c (E)	Dog	China	2020		Canine parvovirus 2 strain HN 092 partial genome=1
ON322834	CG	1	1	c (E)	Dog	China	2020		Canine parvovirus 2 strain HN 093 partial genome=1
ON322835	CG	0	1	c (E)	Dog	China	2020	Asian only in VP2	Canine parvovirus 2 strain HN-097, partial genome
ON322836	CG	1	1	c (E)	Dog	China	2020		Canine parvovirus 2 strain HN 098 partial genome=1
ON322837	CG	1	1	c (E)	Dog	China	2021		Canine parvovirus 2 strain HN 099 partial genome=1
ON322838	CG	1	1	c (E)	Dog	China	2021		Canine parvovirus 2 strain HN 100 partial genome=1
ON322839	CG	1	1	c (E)	Dog	China	2021		Canine parvovirus 2 strain HN 102 partial genome=1
ON322840	CG	1	1	c (E)	Dog	China	2021		Canine parvovirus 2 strain HN 103 partial genome=1
ON322841	CG	0	1	c (E)	Dog	China	2021	Asian only in VP2	Canine parvovirus 2 strain HN-104, partial genome
ON322842	CG	1	1	c (E)	Dog	China	2021		Canine parvovirus 2 strain HN 105 partial genome=1
ON322843	CG	0	1	c (E)	Dog	China	2021	Asian only in VP2	Canine parvovirus 2 strain HN-106, partial genome
ON322844	CG	1	1	c (E)	Dog	China	2021		Canine parvovirus 2 strain HN 107 partial genome=1
ON322845	CG	1	1	c (E)	Dog	China	2021		Canine parvovirus 2 strain HN 108 partial genome=1
ON322846	CG	0	1	c (E)	Dog	China	2021	Asian only in VP2	Canine parvovirus 2 strain HN-109, partial genome
ON322847	CG	1	1	c (E)	Dog	China	2020		Canine parvovirus 2 strain HN 110 partial genome=1
ON322848	CG	1	1	c (E)	Dog	China	2020		Canine parvovirus 2 strain HN 11 partial genome=1
ON323036	VP2		1	c (E)	Canine	Thailand	2018		Canine parvovirus 2 strain CPV-2c isolate CPV2c/Thailand/MUT1/2018 sequence
ON323037	VP2		1	c (E)	Canine	Thailand	2019		Canine parvovirus 2 strain CPV-2c isolate CPV2c/Thailand/MUT3/2019 sequence
ON323038	VP2		1	c (E)	Canine	Thailand	2018		Canine parvovirus 2 strain CPV-2c isolate CPV2c/Thailand/MUT5/2018 sequence
ON323039	VP2		1	c (E)	Canine	Thailand	2018		Canine parvovirus 2 strain CPV-2c isolate CPV2c/Thailand/MUT7/2018 sequence
ON323040	VP2		1	c (E)	Canine	Thailand	2019		Canine parvovirus 2 strain CPV-2c isolate CPV2c/Thailand/MUT9/2019 sequence
ON323041	VP2		1	c (E)	Canine	Thailand	2019		Canine parvovirus 2 strain CPV-2c isolate CPV2c/Thailand/MUT10/2019 sequence
ON323042	VP2		1	c (E)	Canine	Thailand	2019		Canine parvovirus 2 strain CPV-2c isolate CPV2c/Thailand/MUT11/2019 sequence
ON323043	VP2		1	c (E)	Canine	Thailand	2019		Canine parvovirus 2 strain CPV-2c isolate CPV2c/Thailand/MUT14/2019 sequence
ON479069	VP2		1	c (E)	Dog	Italy	2020		Canine parvovirus 2 strain IZSSI 2020PA4943 structural protein VP2 (VP2) gene, partial cds
ON677437	CG	1	1	b (D)	Dog	Italy	2022		Carnivore protoparvovirus strain CPV 2b IZSSI 2022PA2773 partial genome=1
ON733252	CG	1	1	b (D)	Dog	Hungary	2021		Canine parvovirus 2b strain FR1/CPV2 202HUN complete genome=1
OP208805	VP2		1	c (E)	Pangolin	China	2020		Canine parvovirus strain CPV-2c/pangolin/China/P1/20 capsid protein 2 gene, complete cds
OP210300	CG	1	1	c (E)	Dog	Viet Nam	2022		Canine parvovirus isolate Par2 2022 complete genome=630p
OP210301	VP2		1	c (E)	Dog	Viet Nam	2022		Canine parvovirus isolate Par4-2022 capsid protein VP2 gene, complete cds
OP210302	VP2		1	c (E)	Dog	Viet Nam	2022		Canine parvovirus isolate Par1-2022 capsid protein VP2 gene, complete cds
OQ092723	CG	1	1	c (E)	Dog	India	2021		Carnivore protoparvovirus isolate CPV/INDIA/MN0 partial genome=1
OQ092724	CG	1	1	c (E)	Dog	India	2021		Carnivore protoparvovirus isolate CPV/INDIA/MN03 partial genome=1
OQ092725	CG	1	1	c (E)	Dog	India	2021		Carnivore protoparvovirus isolate CPV/INDIA/MN17 partial genome=1
OQ092726	CG	1	1	c (E)	Dog	India	2020		Carnivore protoparvovirus isolate CPV/INDIA/MZ04 partial genome=1
OQ092727	CG	1	1	c (E)	Dog	India	2020		Carnivore protoparvovirus isolate CPV/INDIA/MZ0 partial genome=1
OQ092728	CG	1	1	c (E)	Dog	India	2022		Carnivore protoparvovirus isolate CPV/INDIA/SK06 partial genome=1
OQ092729	CG	1	1	c (E)	Dog	India	2022		Carnivore protoparvovirus isolate CPV/INDIA/SK35 partial genome=1
OQ092730	CG	1	1	c (E)	Dog	India	2022		Carnivore protoparvovirus isolate CPV/INDIA/TR02 partial genome=1
OQ092731	CG	1	1	c (E)	Dog	India	2022		Carnivore protoparvovirus isolate CPV/INDIA/TR06 partial genome=1
OQ092732	CG	1	1	c (E)	Dog	India	2022		Carnivore protoparvovirus isolate CPV/INDIA/TR15 partial genome=1
OQ092733	CG	1	1	c (E)	Dog	India	2022		Carnivore protoparvovirus isolate CPV/INDIA/ML3 partial genome=1
OQ092734	CG	1	1	c (E)	Dog	India	2022		Carnivore protoparvovirus isolate CPV/INDIA/ML35 partial genome=1
OQ092735	CG	1	1	c (E)	Dog	India	2022		Carnivore protoparvovirus isolate CPV/INDIA/ML22 partial genome=1
OQ092736	CG	1	1	c (E)	Dog	India	2022		Carnivore protoparvovirus isolate CPV/INDIA/AM36 partial genome=1
OQ092737	CG	1	1	c (E)	Dog	India	2022		Carnivore protoparvovirus isolate CPV/INDIA/AM26 partial genome=1
OQ092738	CG	1	1	c (E)	Dog	India	2022		Carnivore protoparvovirus 1 isolate CPV/INDIA/AP02, partial genome.
OQ092739	CG	1	1	c (E)	Dog	India	2022		Carnivore protoparvovirus isolate CPV/INDIA/AP49 partial genome=1
OQ092740	CG	1	1	c (E)	Dog	India	2022		Carnivore protoparvovirus isolate CPV/INDIA/AP45 partial genome=1
OQ198119	CG	1	1	c (E)	Canine	China	2020-2021		MAG Canine parvovirus isolate ParvoviridaeDogfe435Cgenomic sequence=1
OR463702	VP2		1	c (E)	Dog	Italy	2021		Protoparvovirus carnivoran1 strain CPV-2c_IZSSI_2021PA28158
OR463703	VP2		0	c (E)	Dog	Italy	2021	440A	Protoparvovirus carnivoran1 strain CPV-2c_IZSSI_2021PA46057
OR463704	VP2		1	c (E)	Dog	Italy	2020		Protoparvovirus carnivoran1 strain CPV-2c_IZSSI_2020PA58063
MH626545	VP2		1	c (E)	Dog	China	2018		Canine parvovirus isolate GX413 capsid protein gene, complete cds
MZ836327	VP2		1	c (E)	Dog	China	2019		Canine parvovirus 2c strain XA-CPV2c-0-8 main capsid protein gene, complete cds
MZ857181	VP2		0	c (E)	Canine	China	2021	440A	Canine parvovirus 2c isolate CDD04 structural protein (VP2) gene, complete cds
MT978643	VP2		0	c (E)	Dog	Myanmar	2018	440A	Canine parvovirus strain CPV-2c/Myanmar/RS-23/2018 capsid protein VP2 gene, partial cds
